# Supplementary material for: New approach for post-functionalization of meso-formylporphyrins
Source: Royal Society of Chemistry journal article supplement (doi:10.1039/c5ra13532j), 2015-01-01
Supplement: c5ra13532j1.pdf [file c5ra13532j1.pdf]

## SUPPORTING INFORMATION

### **New approach for post-functionalization of *meso*-formylporphyrins**

Kirill P. Birin<sup>a,\*</sup>, Yulia G. Gorbunova<sup>a,b</sup>, Aslan Yu. Tsivadze<sup>a,b</sup>

<sup>a</sup>*A.N. Frumkin Institute of Physical Chemistry and Electrochemistry RAS, Leninsky prosp. 31, bldg. 4, Moscow, 119071, Russia. kirill.birin@gmail.com*

<sup>b</sup>*N.S. Kurnakov Institute of General and Inorganic Chemistry RAS, Leninsky prosp. 31, Moscow, 119991, Russia. yulia@igic.ras.ru*

|                                                             |          |
|-------------------------------------------------------------|----------|
| <b>1. General remarks</b> .....                             | <b>2</b> |
| <b>2. Synthetic procedures and characterization</b> .....   | <b>3</b> |
| <b>3. Self-condensation of phenanthrene-1,9-dione</b> ..... | <b>6</b> |
| <b>4. Spectra of the synthesized compounds</b> .....        | <b>8</b> |

## 1. General remarks

Phenanthrene-1,10-dione, <sup>[1]</sup> phenanthroline-1,10-dione, <sup>[2]</sup> **1Cu**, <sup>[3]</sup> **2Cu** <sup>[3]</sup> were prepared according to published procedures.

POCl<sub>3</sub> (Aldrich, 99%), DMF (Sigma-Aldrich, >99%), 1,2-dichloroethane (DCE, Fluka, >99%), AcOH (Sigma-Aldrich, >99%), CH<sub>2</sub>Cl<sub>2</sub> (reagent grade, 99%), TFA (Sigma-Aldrich, 99%), H<sub>2</sub>SO<sub>4</sub> (reagent grade, 93-95%), NH<sub>4</sub>OAc (Merck, >98%), NaHCO<sub>3</sub> (reagent grade, >99%) were used without purification. Reagent grade CHCl<sub>3</sub> was dried over CaCl<sub>2</sub> and distilled over K<sub>2</sub>CO<sub>3</sub> prior to use.

TLC was performed at Silica gel 60 F<sub>254</sub> plates (Merck). Column chromatography was performed at glass columns with silica 60 (0.063-0.2 mm) and neutral alumina (Macherey-Nagel).

NMR spectra were acquired at Bruker Avance II 300 MHz and Bruker Avance III 600 MHz spectrometers in CDCl<sub>3</sub> or CDCl<sub>3</sub>/MeOD mixture, CHCl<sub>3</sub> residual signal (7.24 ppm) was used as internal reference. UV-Vis spectra were recorded at Unicam UV-4 spectrophotometer in CHCl<sub>3</sub> in rectangular quartz cells with 1 cm optical path. MALDI-TOF mass-spectra were obtained on Bruker Ultraflex mass-spectrometer in positive ion mode without application of matrix.

Geometry optimization and molecular orbitals analysis were performed at the density functional theory (DFT) level with SPARTAN'14 software (Wavefunction Inc.). The Becke's three parameter hybrid functional with the Lee-Yang-Parr correlation functional (B3LYP) method was employed to do the calculations using 6-31G\* basis set.

## 2. Synthetic procedures and characterization

**3Cu and 4Cu.** The modification to published procedure [3,4] was applied for formylation. POCl<sub>3</sub> (1.75 ml) was added to solution of DMF (1.75 ml) in DCE (5 ml) upon stirring at ambient temperature and kept for 0.5 hours. The obtained solution was added to solution of **1Cu** or **2Cu** (0.7 mmol) in DCE (95 ml) and the obtained mixture was heated at 60°C under dry argon until complete consumption of starting material was revealed by TLC (*ca.* 6 hours). The mixture was cooled to room temperature and water (50 ml) was added. The water phase was neutralized with solid NaHCO<sub>3</sub>, organic phase was separated, dried over Na<sub>2</sub>SO<sub>4</sub> and evaporated to dryness. The residue was passed through a pad of silica with CHCl<sub>3</sub> and the resulting solution was evaporated to give pure **3Cu** (92%) or **4Cu** (98%). The physico-chemical characteristics of the obtained compounds are equal to published ones. [3,4]

**7Cu.** Mixture of **4Cu** (0.2 mmol, 128 mg), **A** (0.2 mmol, 42 mg) and NH<sub>4</sub>OAc (2 mmol, 154 mg) was gently refluxed in CHCl<sub>3</sub> (34 ml) and AcOH (6 ml) for 24 hours. As a second step the same amount of **A** and NH<sub>4</sub>OAc were added and reflux was continued for additional 24 hours. Afterwards, this procedure was repeated once more for further 24 hours. The mixture was cooled to ambient temperature, diluted with CHCl<sub>3</sub> (50 ml) and extracted with water (50 ml). Organic layer was separated, dried over Na<sub>2</sub>SO<sub>4</sub>, evaporated and applied in CH<sub>2</sub>Cl<sub>2</sub> to silica column packed in hexane. The column was eluted with CH<sub>2</sub>Cl<sub>2</sub>/hexane (50→100% of CH<sub>2</sub>Cl<sub>2</sub>) and then CH<sub>2</sub>Cl<sub>2</sub>/acetone mixtures (0→0.6% of acetone). The obtained fraction of **7Cu** was evaporated to give 90% (147 mg) of pure compound.

MALDI TOF MS: m/z calculated for C<sub>53</sub>H<sub>40</sub>CuN<sub>6</sub> [M]<sup>+</sup> 823.26, found 823.21.

UV-Vis (CHCl<sub>3</sub>; λ, nm; rel. int): 255 (0.260), 283 (0.091), 306 (0.087), 411 (1.000), 535 (0.067), 561 (sh, 0.018).

**8Cu.** Mixture of **4Cu** (0.1 mmol, 64 mg), **B** (0.2 mmol, 42 mg) and NH<sub>4</sub>OAc (2 mmol, 154 mg) was gently refluxed in CHCl<sub>3</sub> (17 ml) and AcOH (3 ml) for 24 hours. As a second step the same amount of **B** and NH<sub>4</sub>OAc were added and reflux was continued for additional 24 hours. Afterwards, this procedure was repeated once more for further 24 hours. The mixture was cooled to ambient temperature, diluted with CHCl<sub>3</sub> (50 ml) and extracted with water (50 ml). Organic layer was separated and stirred with 200 mg of solid K<sub>2</sub>CO<sub>3</sub> for 0.5 hour, then dried over Na<sub>2</sub>SO<sub>4</sub>, evaporated and applied in CHCl<sub>3</sub> to silica column packed in CHCl<sub>3</sub>. The column was eluted with CHCl<sub>3</sub>/MeOH mixtures (0→10% of MeOH). The obtained fraction of **8Cu** was evaporated to give 62% (51 mg) of pure compound.

MALDI TOF MS: m/z calculated for C<sub>51</sub>H<sub>38</sub>CuN<sub>8</sub> [M]<sup>+</sup> 825.25, found 825.23.

UV-Vis (CHCl<sub>3</sub>; λ, nm; rel. int): 277 (0.129), 411 (1.000), 534 (0.050), 564 (sh, 0.012).

**9Cu.** Mixture of **3Cu** (0.1 mmol, 55 mg), **A** (0.1 mmol, 21 mg) and NH<sub>4</sub>OAc (1 mmol, 77 mg) was gently refluxed in CHCl<sub>3</sub> (17 ml) and AcOH (3 ml) for 24 hours. As a second step the same amount of **A** and NH<sub>4</sub>OAc were added and reflux was continued for additional 24 hours. Afterwards this procedure was repeated once more for further 24 hours. The mixture was cooled to ambient temperature, diluted with CHCl<sub>3</sub> (50 ml) and extracted with water (50 ml). Organic layer, containing a fine suspension of **5Cu**, was separated and evaporated to dryness. DMF (10 ml), 1-bromobutane (0.5 mmol, 54 μl) and K<sub>2</sub>CO<sub>3</sub> (0.6 mmol, 83 mg) were added and the mixture was heated at 100°C for 24 h under argon atmosphere. Then the mixture was cooled to ambient temperature, diluted with CHCl<sub>3</sub> (50 ml) and extracted with water (50 ml). The organic layer was dried over Na<sub>2</sub>SO<sub>4</sub> evaporated with silica and applied to silica column packed in hexane. The

column was eluted with CHCl<sub>3</sub>/hexane mixtures (0→40% of CHCl<sub>3</sub>) and CHCl<sub>3</sub>/hexane/acetone mixture (40% of CHCl<sub>3</sub> and 0.1% of acetone). The obtained fraction of **9Cu** was evaporated to give 83% (66 mg) of pure compound (for 2 steps from **3Cu**).

MALDI TOF MS: m/z calculated for C<sub>51</sub>H<sub>36</sub>CuN<sub>6</sub> [M]<sup>+</sup> 795.23, found 795.20.

UV-Vis (CHCl<sub>3</sub>; λ, nm; rel. int): 285 (0.095), 308 (0.085), 338 (0.048), 411 (1.000), 534 (0.074), 566 (0.029).

**10Cu**. Mixture of **3Cu** (0.1 mmol, 55 mg), **B** (0.2 mmol, 42 mg) and NH<sub>4</sub>OAc (2 mmol, 154 mg) was gently refluxed in CHCl<sub>3</sub> (17 ml) and AcOH (3 ml) for 24 hours. As a second step the same amount of **B** and NH<sub>4</sub>OAc were added and reflux was continued for additional 24 hours. Afterwards, this procedure was repeated once more for further 24 hours. The mixture was cooled to ambient temperature, diluted with CHCl<sub>3</sub> (50 ml) and extracted with water (50 ml). Organic layer, containing a fine suspension of **6Cu**, was separated and evaporated to dryness. DMF (10 ml), 1-bromobutane (0.5 mmol, 54 μl) and K<sub>2</sub>CO<sub>3</sub> (0.6 mmol, 83 mg) were added and the mixture was heated at 100°C for 24 h under argon atmosphere. Then the mixture was cooled to ambient temperature, diluted with CHCl<sub>3</sub> (50 ml) and extracted with water (50 ml). The organic layer was dried over Na<sub>2</sub>SO<sub>4</sub> evaporated with silica and applied to silica column packed in hexane. The column was eluted with CHCl<sub>3</sub>/hexane mixtures (0→40% of CHCl<sub>3</sub>) and CHCl<sub>3</sub>/hexane/acetone mixture (40% of CHCl<sub>3</sub> and 0.1% of acetone). The obtained fraction of **10Cu** was evaporated to give 58% (46 mg) of pure compound (for 2 steps from **3Cu**).

MALDI TOF MS: m/z calculated for C<sub>49</sub>H<sub>35</sub>CuN<sub>8</sub> [M+H]<sup>+</sup> 798.23, found 798.13.

UV-Vis (CHCl<sub>3</sub>; λ, nm; rel. int): 285 (0.136), 410 (1.000), 534 (0.053), 566 (0.016).

**Demetallation of 3Cu, 7Cu-10Cu**. The copper(II) porphyrin was dissolved or suspended in TFA (4 ml per 0.1 mmol) and H<sub>2</sub>SO<sub>4</sub> was added (0.6 ml per 0.1 mmol) upon intense stirring. The mixture was stirred at ambient temperature for 15 min, afterwards CHCl<sub>3</sub> (20 ml per 0.1 mmol) and water (20 ml per 0.1 mmol) were added. The water phase was neutralized with solid NaHCO<sub>3</sub> at vigorous stirring and organic layer was separated. The CHCl<sub>3</sub> solution was stirred with K<sub>2</sub>CO<sub>3</sub> for 15 min, dried over Na<sub>2</sub>SO<sub>4</sub> and evaporated. The residue was passed through a plug of silica with CHCl<sub>3</sub> (**3H<sub>2</sub>**, **7H<sub>2</sub>**, **9H<sub>2</sub>**), 1% of MeOH in CHCl<sub>3</sub> (**10H<sub>2</sub>**) or alumina (Brockman III grade) with 2% of MeOH in CH<sub>2</sub>Cl<sub>2</sub> (**8H<sub>2</sub>**), followed by size-exclusion chromatography with 4% EtOH in CHCl<sub>3</sub>.

**3H<sub>2</sub>**. Yield 94%. The characteristics are equal to published ones. [3]

**7H<sub>2</sub>**. Yield 88%. MALDI TOF MS: m/z calculated for C<sub>53</sub>H<sub>42</sub>N<sub>6</sub> [M]<sup>+</sup> 762.35, found 762.28.

<sup>1</sup>H NMR (600 MHz; CDCl<sub>3</sub>; δ, ppm; *J*, Hz): 10.77 (s, 1H, NH), 10.21 (s, 1H, H<sub>meso</sub>), 9.30 (d, 2H, <sup>3</sup>*J* = 4.6, H<sub>β</sub>), 9.20 (d, 2H, <sup>3</sup>*J* = 4.8, H<sub>β</sub>), 9.08 (d, 1H, <sup>3</sup>*J* = 7.9, H<sub>Ar</sub>), 8.94-8.86 (m, 2H, H<sub>Ar</sub>), 8.84 (d, 2H, <sup>3</sup>*J* = 4.6, H<sub>β</sub>), 8.81 (d, 2H, <sup>3</sup>*J* = 4.8, H<sub>β</sub>), 8.13 (d, 1H, <sup>3</sup>*J* = 7.8, H<sub>Ar</sub>), 7.82 (t, 1H, <sup>3</sup>*J* = 7.6, H<sub>Ar</sub>), 7.78-7.64 (m, 3H, H<sub>Ar</sub>), 7.29 (s, 4H, H<sub>Mes</sub>), 2.62 (s, 6H, H<sub>p-Me</sub>), 1.84 (s, 12H, H<sub>o-Me</sub>), -2.83 (s, 2H, NH<sub>Por</sub>).

UV-Vis (CHCl<sub>3</sub>; λ, nm; rel. int): 254 (0.315), 305 (0.106), 415 (1.000), 510 (0.078), 550 (0.037), 584 (0.032), 642 (0.019).

**8H<sub>2</sub>**. Yield 87%. MALDI TOF MS: m/z calculated for C<sub>51</sub>H<sub>40</sub>N<sub>8</sub> [M]<sup>+</sup> 764.34, found 764.30.

<sup>1</sup>H NMR (300 MHz; CDCl<sub>3</sub>; δ, ppm; *J*, Hz): 10.20 (s, 1H, H<sub>meso</sub>), 9.28 (d, 2H, <sup>3</sup>*J* = 4.6, H<sub>β</sub>), 9.14 (br.s, 2H, H<sub>Ar</sub>), 9.11 (d, 2H, <sup>3</sup>*J* = 4.8, H<sub>β</sub>), 8.81 (d, 2H, <sup>3</sup>*J* = 4.6, H<sub>β</sub>), 8.77 (d, 2H, <sup>3</sup>*J* = 4.8, H<sub>β</sub>), 8.53 (br.s, 1H, H<sub>Ar</sub>), 7.83-7.48 (br.m, 3H, H<sub>Ar</sub>), 2.61 (s, 6H, H<sub>p-Me</sub>), 1.80 (s, 12H, H<sub>o-Me</sub>), -2.90 (s, 2H, NH<sub>Por</sub>).

UV-Vis (CHCl<sub>3</sub>; λ, nm; rel. int): 284 (0.119), 415 (1.000), 509 (0.070), 549 (0.025), 582 (0.027), 642 (0.014).

**9H<sub>2</sub>**. Yield 97%. MALDI TOF MS: m/z calculated for C<sub>51</sub>H<sub>38</sub>N<sub>6</sub> [M]<sup>+</sup> 734.32, found 734.71.

<sup>1</sup>H NMR (600 MHz; CDCl<sub>3</sub>; δ, ppm; J, Hz): 10.31 (s, 1H, H<sub>meso</sub>), 9.37 (d, 2H, <sup>3</sup>J = 4.7, H<sub>β</sub>), 9.07-8.99 (m, 4H, 2H<sub>β</sub>+2H<sub>Ar</sub>), 8.94 (d, 2H, <sup>3</sup>J = 4.8, H<sub>β</sub>), 8.46-8.40 (m, 1H, H<sub>Ar</sub>), 8.33-8.25 (m, 2H, H<sub>Ar</sub>), 8.22-8.15 (m, 2H, H<sub>Ar</sub>), 7.83-7.69 (m, 10H, H<sub>Ph</sub>), 4.36 (t, 2H, <sup>3</sup>J = 8.0, CH<sub>2</sub>), 1.71 (quint, 2H, <sup>3</sup>J = 7.8, CH<sub>2</sub>), 0.66 (sext, 2H, <sup>3</sup>J = 7.4, CH<sub>2</sub>), 0.24 (t, 3H, <sup>3</sup>J = 7.4, CH<sub>3</sub>), -2.90 (s, 2H, NH<sub>Por</sub>).

UV-Vis (CHCl<sub>3</sub>; λ, nm; rel. int): 256 (0.272), 414 (1.000), 510 (0.080), 546 (0.039), 582 (0.037), 640 (0.020).

**10H<sub>2</sub>**. Yield 95%. MALDI TOF MS: m/z calculated for C<sub>49</sub>H<sub>37</sub>N<sub>8</sub> [M+H]<sup>+</sup> 737.31, found 737.31

<sup>1</sup>H NMR (600 MHz; CDCl<sub>3</sub>; δ, ppm; J, Hz): 10.34 (s, 1H, H<sub>meso</sub>), 9.39 (d, 2H, <sup>3</sup>J = 4.6, H<sub>β</sub>), 9.33-9.27 (br.m, 3H, H<sub>Ar</sub>), 9.05 (d, 2H, <sup>3</sup>J = 4.5, H<sub>β</sub>), 8.97 (d, 2H, <sup>3</sup>J = 4.8, H<sub>β</sub>), 8.86 (d, 2H, <sup>3</sup>J = 4.8, H<sub>β</sub>), 8.71 (d, 1H, <sup>3</sup>J = 8.2, H<sub>Ar</sub>), 8.34-8.26 (m, 2H, H<sub>Ar</sub>), 8.24-8.16 (m, 2H, H<sub>Ar</sub>), 7.84-7.74 (m, 10H, H<sub>Ph</sub>), 4.36 (t, 2H, <sup>3</sup>J = 7.7, CH<sub>2</sub>), 0.87 (quint, 2H, <sup>3</sup>J = 7.2, CH<sub>2</sub>), 0.68 (sext, 2H, <sup>3</sup>J = 7.4, CH<sub>2</sub>), 0.25 (t, 3H, <sup>3</sup>J = 7.3, CH<sub>3</sub>), -2.89 (s, 2H, NH<sub>Por</sub>).

UV-Vis (CHCl<sub>3</sub>; λ, nm; rel. int): 253 (0.136), 286 (0.106), 414 (1.289), 510 (0.054), 540 (0.019), 581 (0.020), 635 (0.009).

**5H<sub>2</sub>. Route 1. Demetallation of 5Cu.** Suspension of **5Cu** in CHCl<sub>3</sub>, obtained as described in the preparation of **9Cu** from **3Cu** (0.1 mmol, 55 mg), was evaporated to dryness and suspended in TFA (2 ml). H<sub>2</sub>SO<sub>4</sub> (0.6 ml) was slowly added upon vigorous stirring and the mixture was stirred at ambient temperature for 15 min. Afterwards CHCl<sub>3</sub> (20 ml) and water (20 ml) were added and water phase was neutralized with solid Na<sub>2</sub>CO<sub>3</sub>. Organic layer was separated and evaporated to dryness. The residue was suspended in MeOH, filtered and washed successively with MeOH. The solid was washed from filter with CHCl<sub>3</sub>/MeOH mixture (1/1) and evaporated to give 41 mg (61%) of **5H<sub>2</sub>**.

**Route 2.** The procedure for preparation of **5Cu** was applied with **3H<sub>2</sub>** (0.1 mmol, 49 mg) as starting material. The obtained reaction mixture containing suspension of **5H<sub>2</sub>** was extracted with water (50 ml) and evaporated to dryness. The residue was suspended in MeOH, filtered and washed with MeOH successively. The obtained solid was dissolved and washed off from filter with CHCl<sub>3</sub>/MeOH (1/1) mixture. The evaporation of the obtained solution gave 64 mg (95%) of **5H<sub>2</sub>**.

MALDI TOF MS: m/z calculated for C<sub>47</sub>H<sub>30</sub>N<sub>6</sub> [M]<sup>+</sup> 678.25, found 677.62.

<sup>1</sup>H NMR (300 MHz; 20% MeOD in CDCl<sub>3</sub>; δ, ppm; J, Hz): 10.22 (s, 1H, H<sub>meso</sub>), 9.26 (br.d, 2H, <sup>3</sup>J = 4.3, H<sub>β</sub>), 8.99 (br.d, 2H, <sup>3</sup>J = 4.3, H<sub>β</sub>), 8.89 (d, 2H, <sup>3</sup>J = 4.4, H<sub>β</sub>), 8.81 (d, 2H, <sup>3</sup>J = 4.4, H<sub>β</sub>), 8.69-8.78 (br.s, 3H, H<sub>Ar</sub>), 8.21 (br.s, 1H, H<sub>Ar</sub>), 8.03-8.11 (m, 4H, H<sub>o-Ph</sub>), 7.69-7.61 (m, 6H, H<sub>m+p-Ph</sub>), 7.61-7.50 (br.m, 4H, H<sub>Ar</sub>). NH-protons are not observed because of exchange with MeOD.

UV-Vis (CHCl<sub>3</sub>; λ, nm; rel. int): 258 (0.310), 414 (1.000), 512 (0.114), 550 (0.063), 584 (0.062), 644 (0.045).

**Alkylation of 5H<sub>2</sub> to give 9H<sub>2</sub>.** Following the procedure for **9Cu** and **10Cu**, alkylation of **5H<sub>2</sub>** (0.075 mmol, 51 mg) afforded 89% (49 mg) of **9H<sub>2</sub>**. The characteristics are equal to described above compound.

## References

1. Linstead R. P., Doering W. E., *J. Am. Chem. Soc.*, **1942**, 64, 1991–2003.
2. Zheng R. H., Guo H. C., Jiang H. J., Xu K. H., Liu B. B., Sun W. L., Shen Z. Q., *Chin. Chem. Lett.*, **2010**, 21, 1270–1272.

- Morotti T., Pizzotti M., Ugo R., Quici S., Bruschi M., Mussini P., Righetto S., *Eur. J. Inorg. Chem.*, **2006**, 2006, 1743–1757.
- Carcel C. M., Laha J. K., Loewe R. S., Thamyongkit P., Schweikart K.-H., Misra V., Bocian D. F., Lindsey J. S., *J. Org. Chem.*, **2004**, 69, 6739–6750.

### 3. Self-condensation of phenanthredione

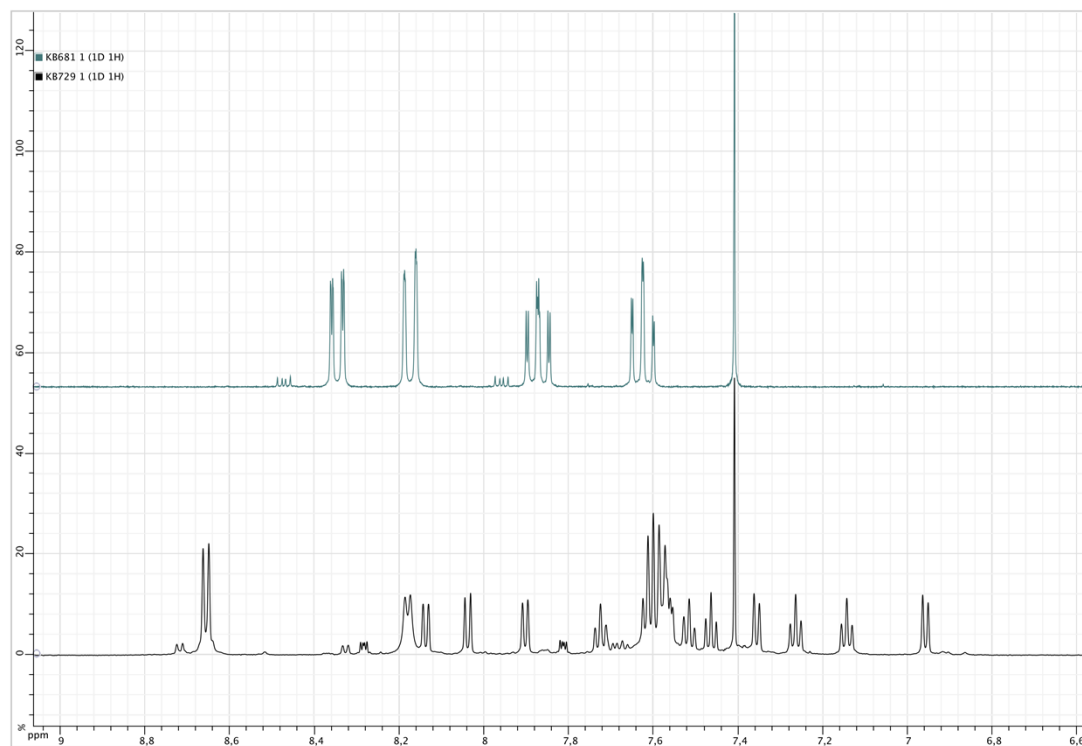

**Fig. S1.** <sup>1</sup>H NMR spectra of 5,6-phenanthredione (top, CDCl<sub>3</sub>) and the condensation product (bottom, CDCl<sub>3</sub>/MeOD = 1/1), obtained after 24 hours of reflux in CHCl<sub>3</sub>/AcOH in the presence of excess of NH<sub>4</sub>OAc. The spectra are referenced by residual solvent signal.

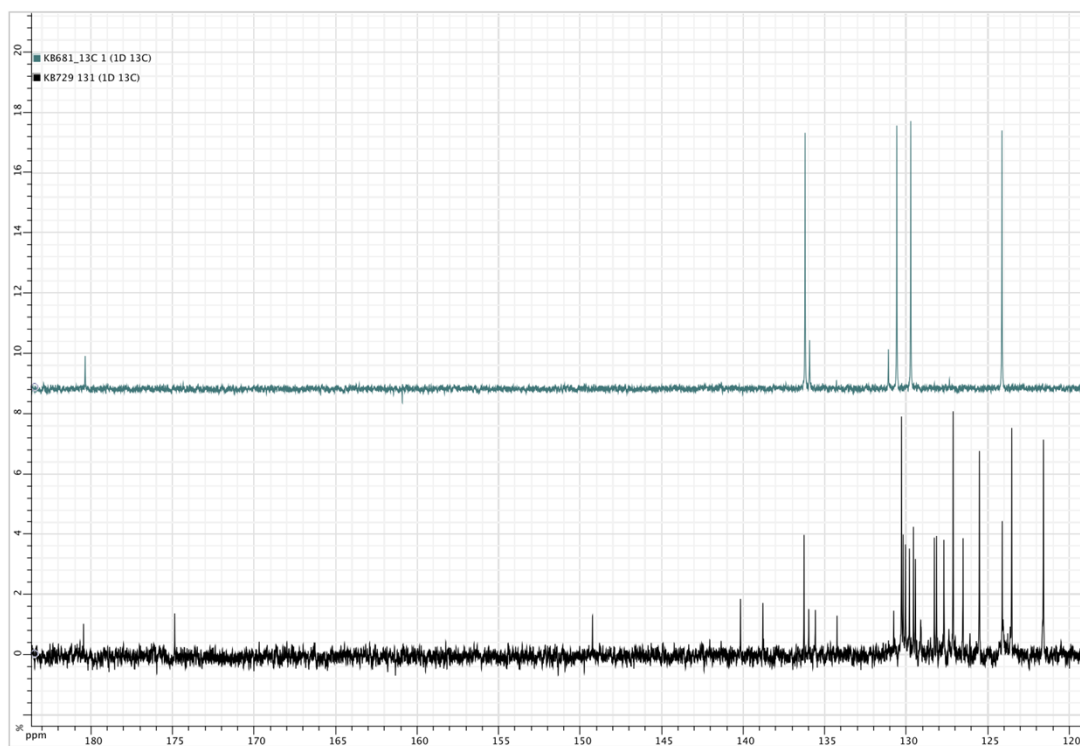

**Fig. S2.**  $^{13}\text{C}$  NMR spectra of 5,6-phenanthrenedione (top,  $\text{CDCl}_3$ ) and the condensation product (bottom,  $\text{CDCl}_3/\text{MeOD} = 1/1$ ), obtained after 24 hours of reflux in  $\text{CHCl}_3/\text{AcOH}$  in the presence of excess of  $\text{NH}_4\text{OAc}$ . The spectra are referenced by residual solvent signal.

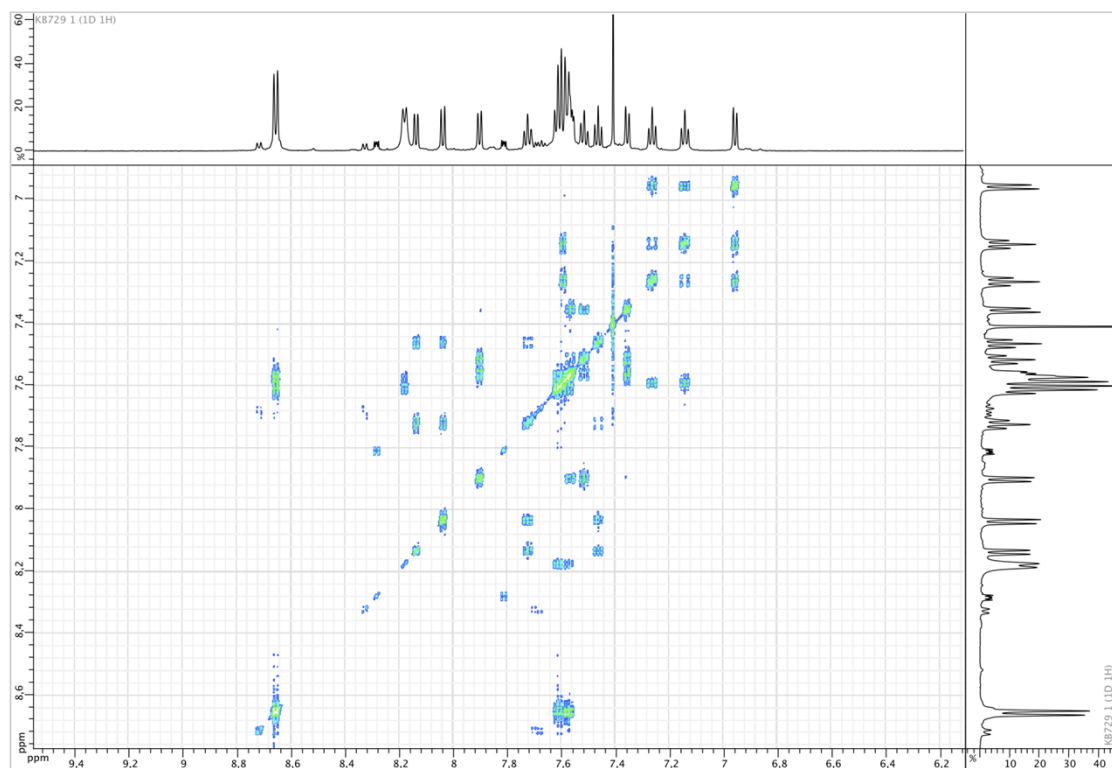

**Fig. S3.**  $^1\text{H}$ - $^1\text{H}$  COSY spectrum ( $\text{CDCl}_3/\text{MeOD} = 1/1$ ) of the condensation product, obtained after 24 hours of reflux in  $\text{CHCl}_3/\text{AcOH}$  in the presence of excess of  $\text{NH}_4\text{OAc}$ .

## 4. Spectra of the synthesized compounds

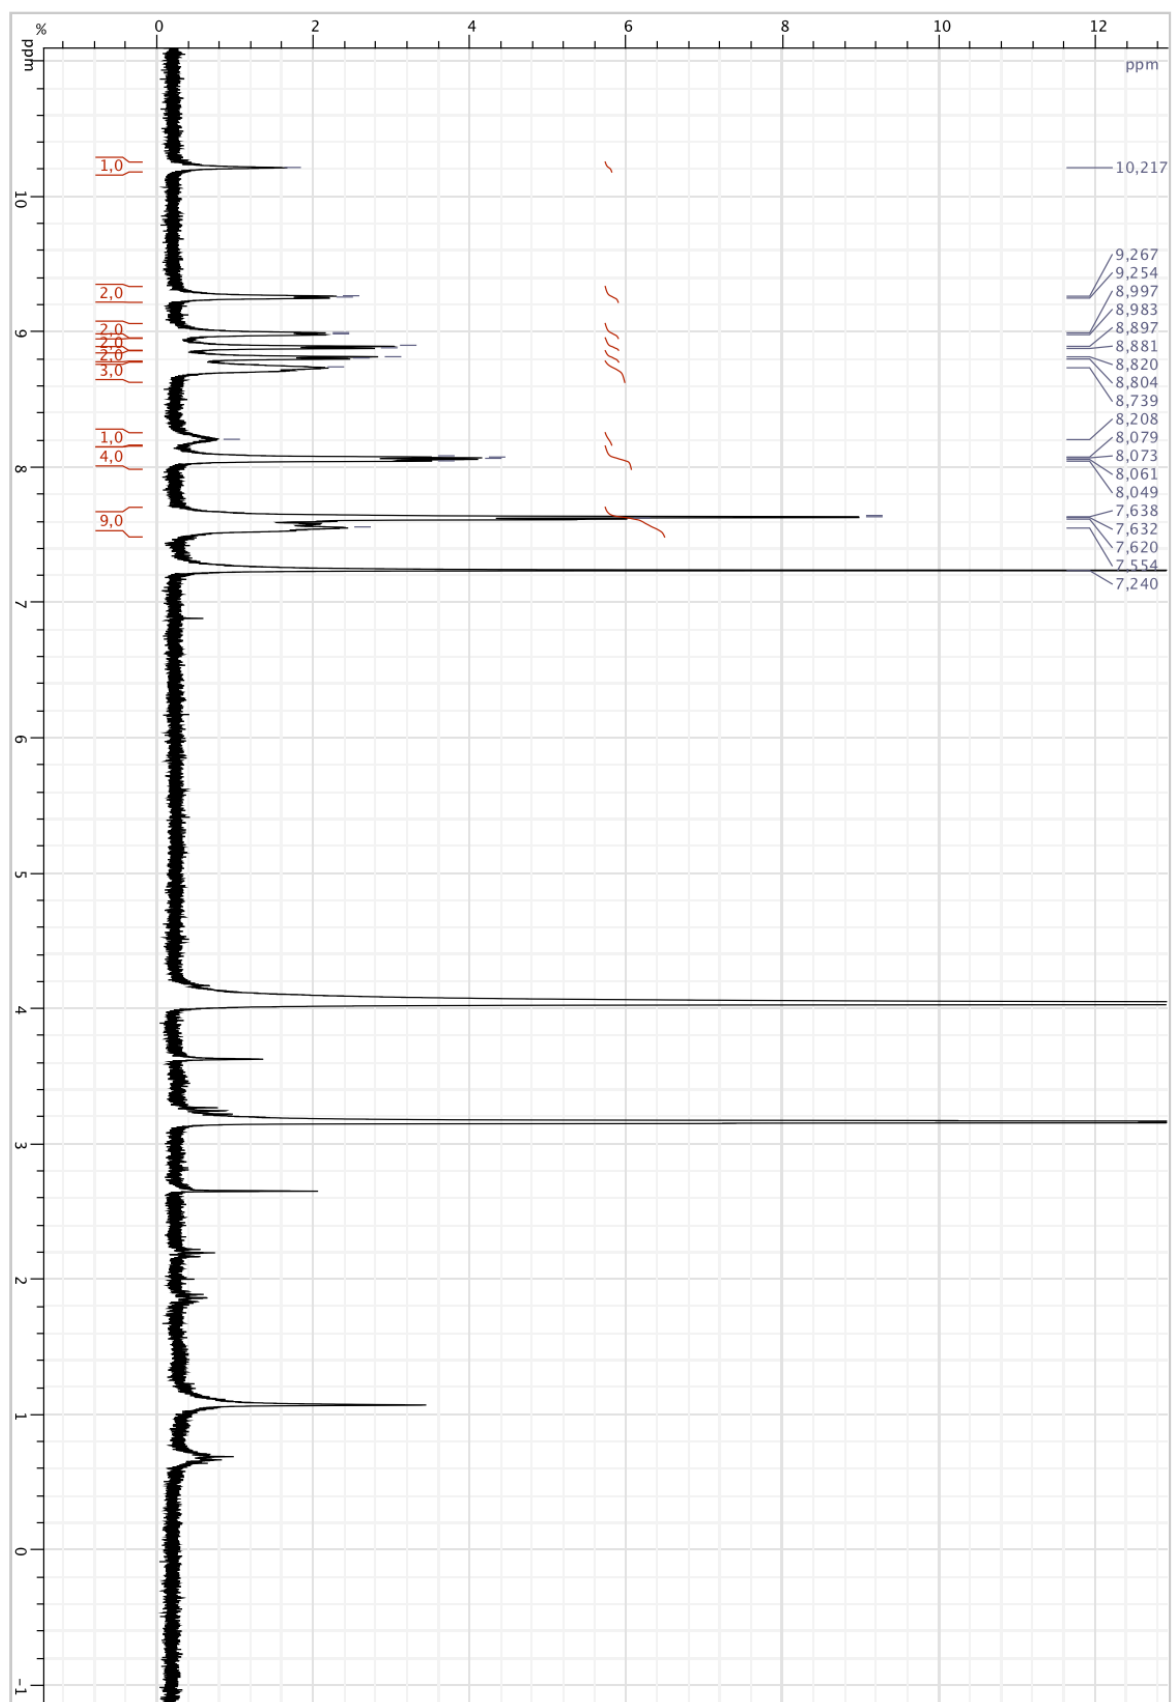

Fig. S4.  $^1\text{H-NMR}$  spectrum of  $5\text{H}_2$  (300 MHz, 20% of MeOD in  $\text{CDCl}_3$ ).



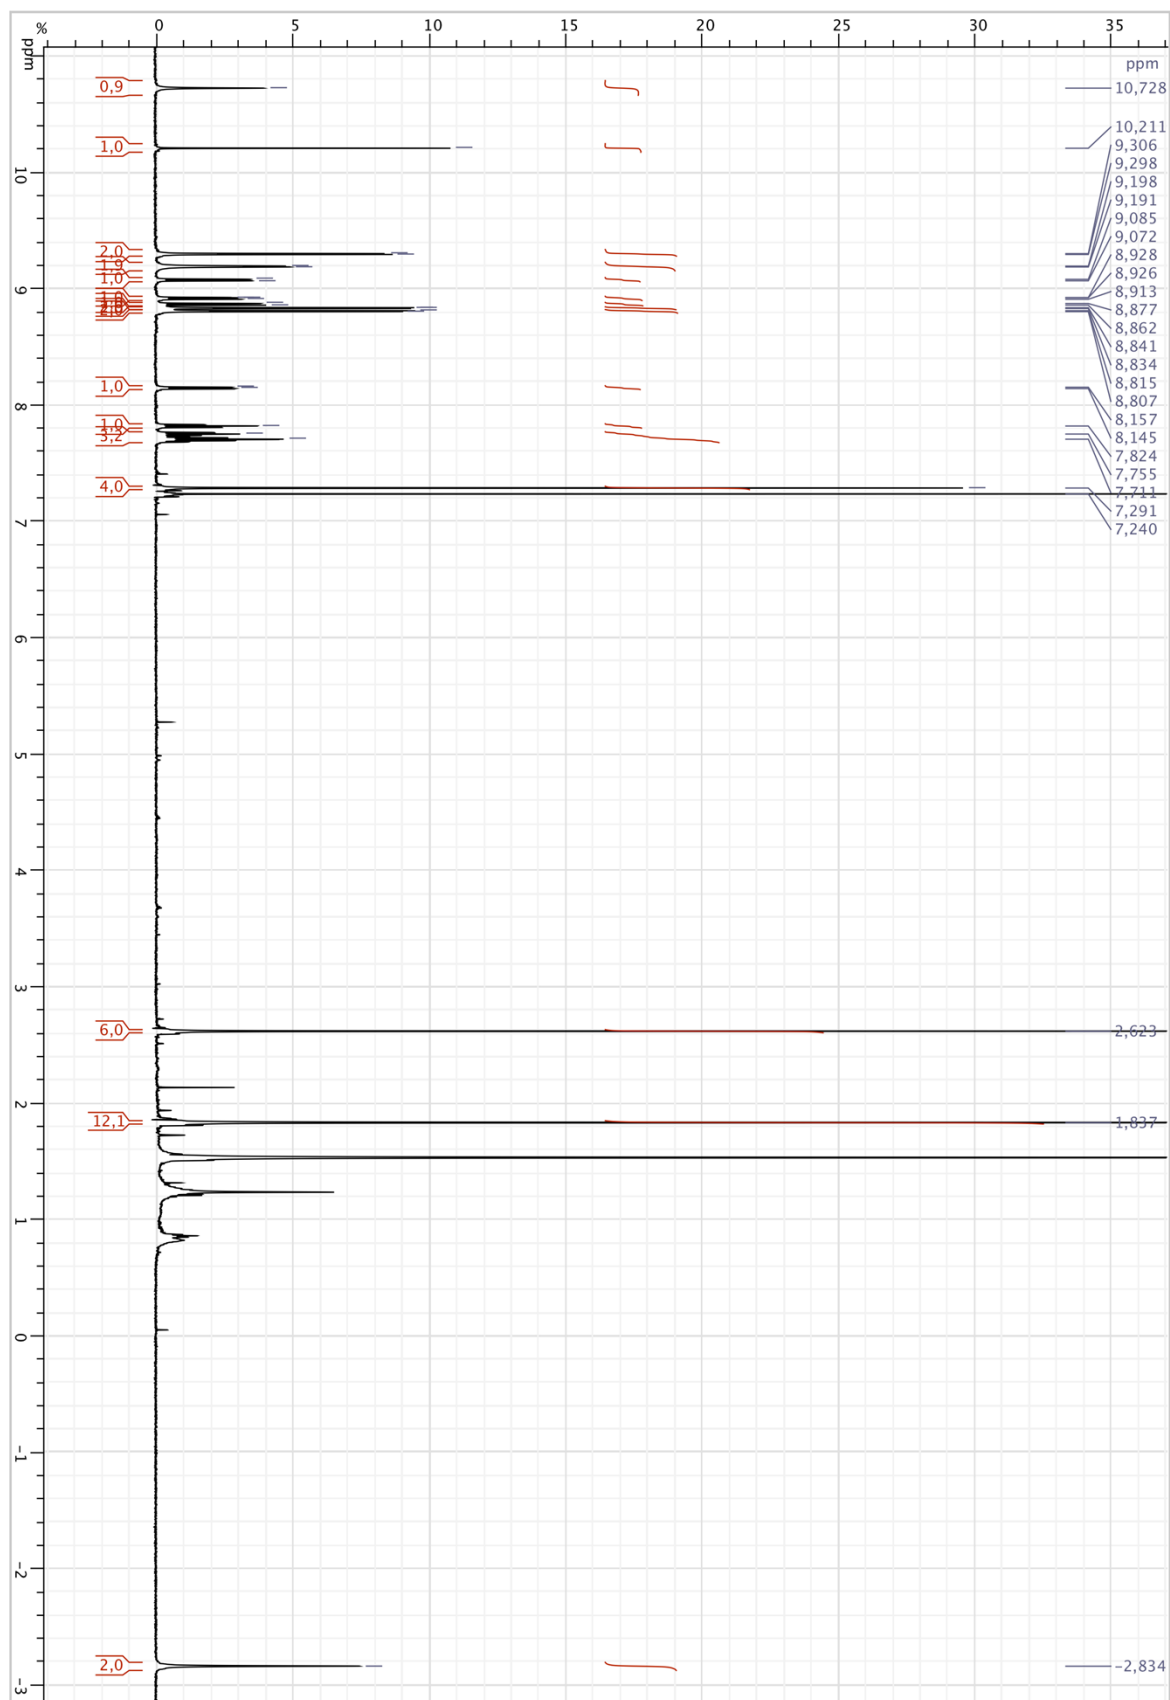

Fig. S5. <sup>1</sup>H-NMR spectrum of 7H<sub>2</sub> (600 MHz, CDCl<sub>3</sub>).

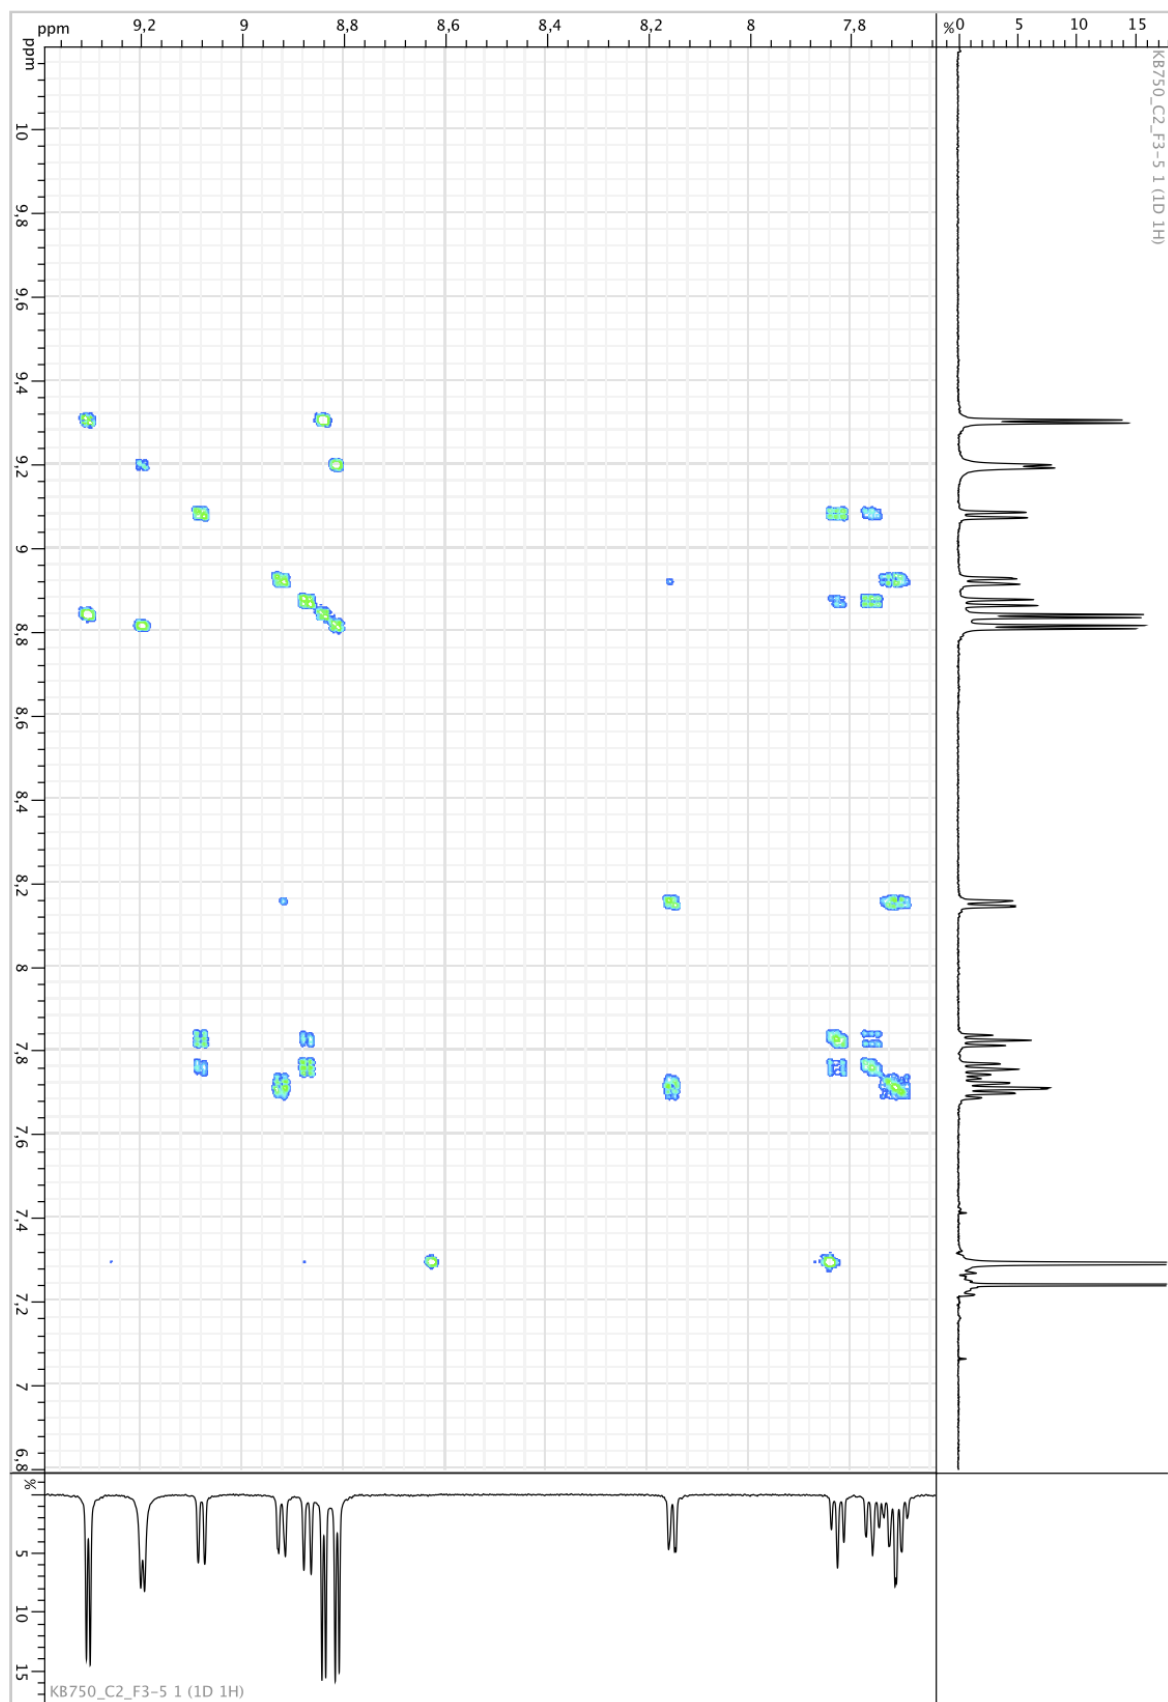

**Fig. S6.**  $^1\text{H}$ - $^1\text{H}$  COSY spectrum of **7H<sub>2</sub>** in aromatic region (600 MHz,  $\text{CDCl}_3$ ).

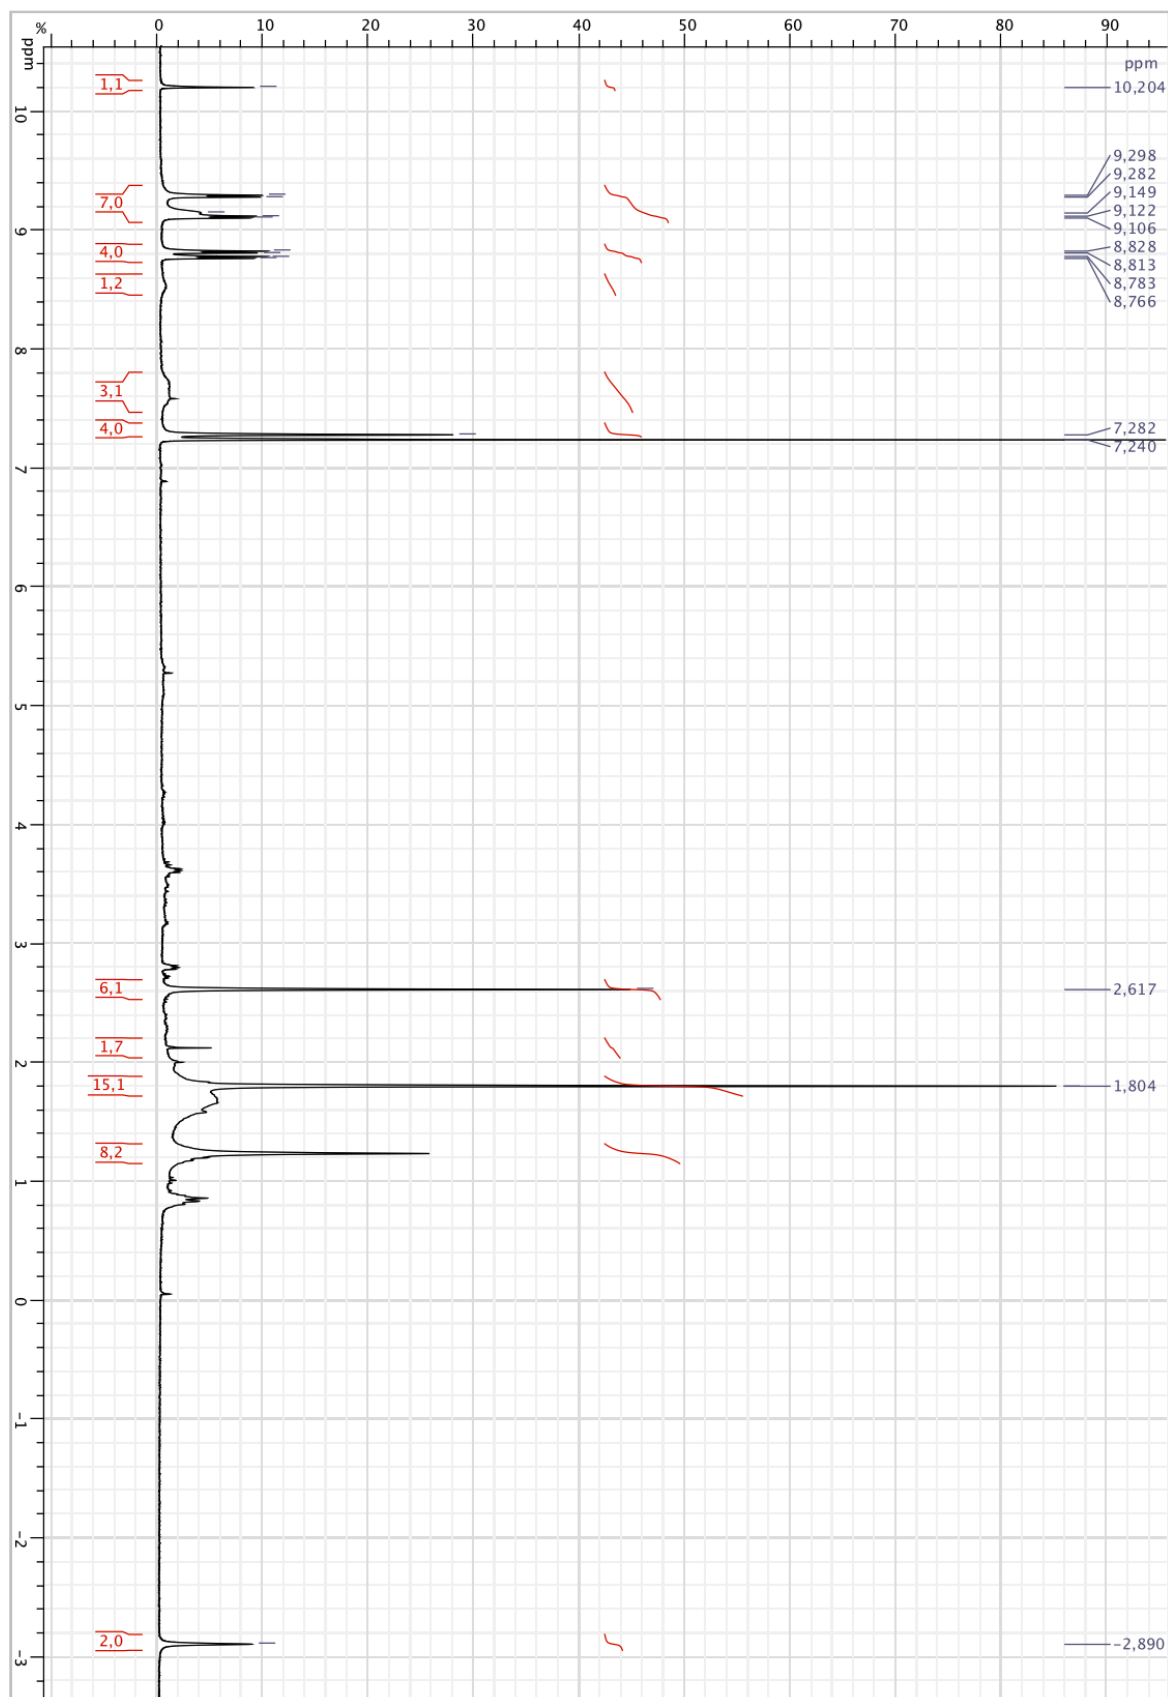

Fig. S7.  $^1\text{H-NMR}$  spectrum of  $8\text{H}_2$  (300 MHz,  $\text{CDCl}_3$ ).

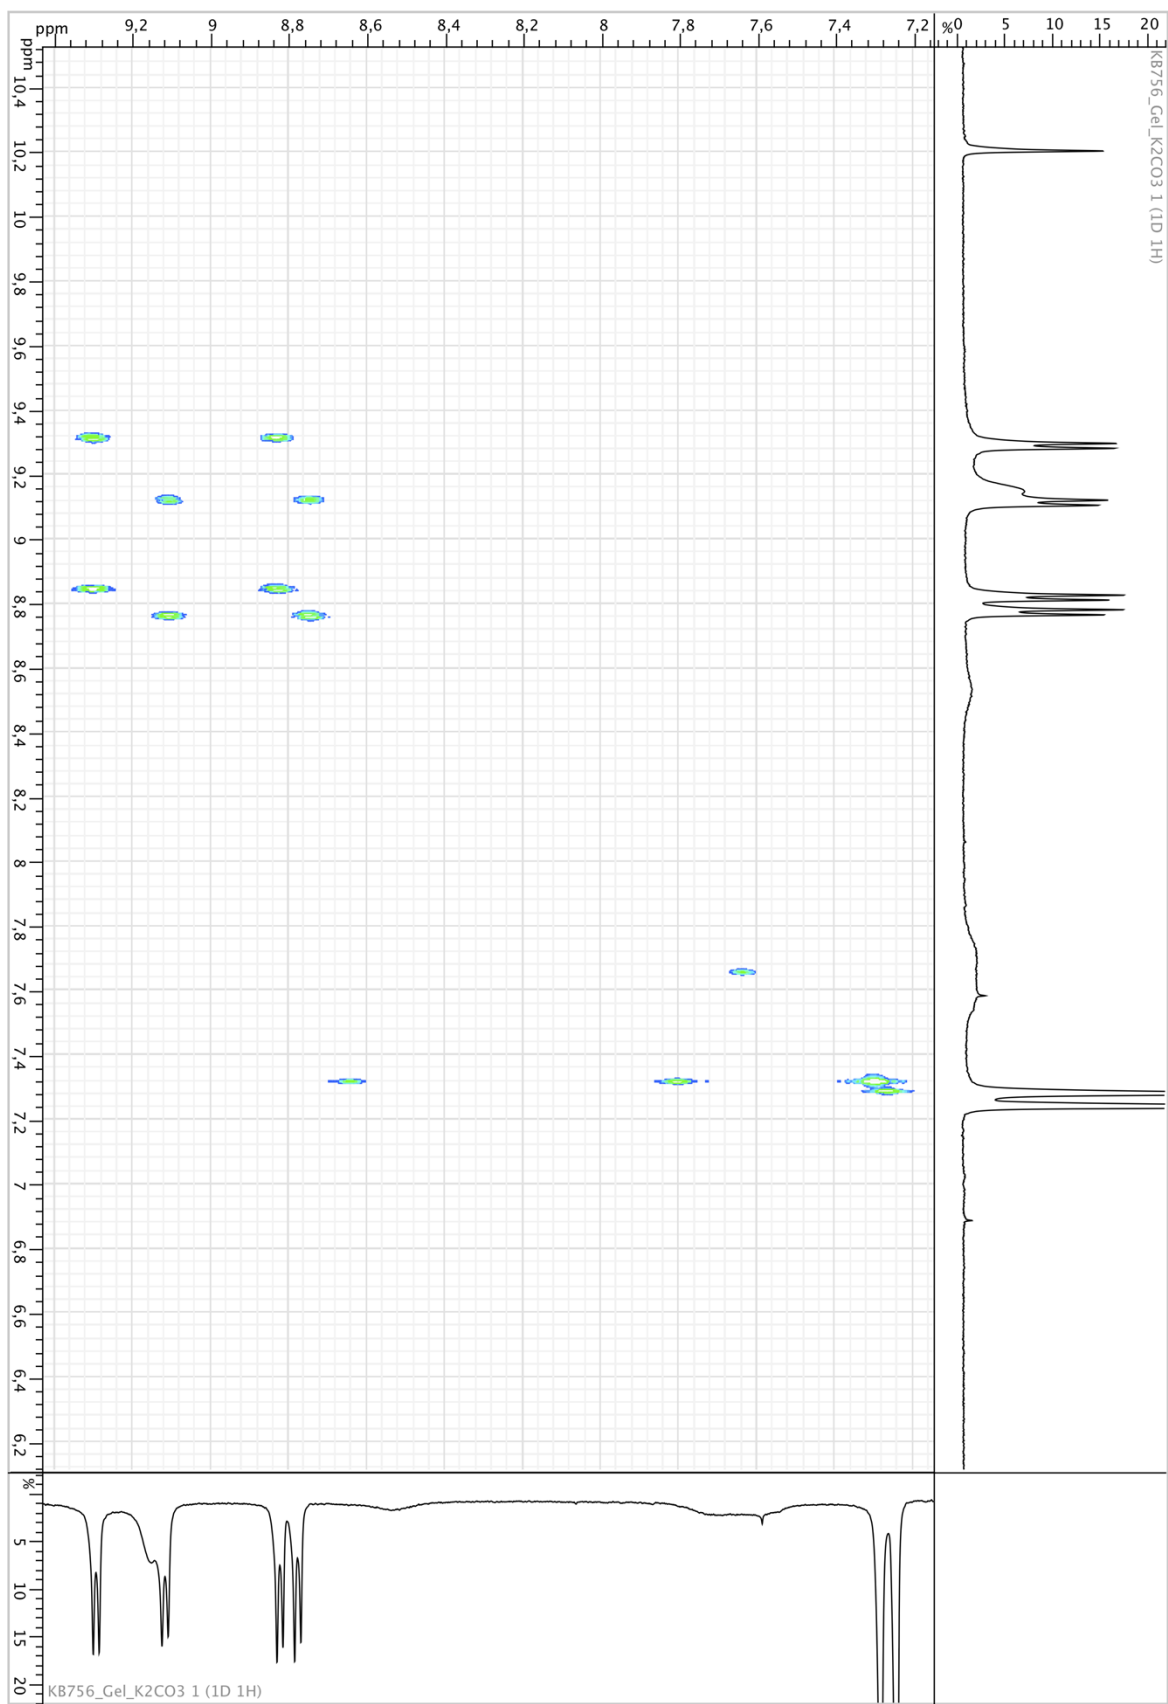

**Fig. S8.**  $^1\text{H}$ - $^1\text{H}$  COSY spectrum of **8H<sub>2</sub>** in aromatic region (600 MHz,  $\text{CDCl}_3$ ).

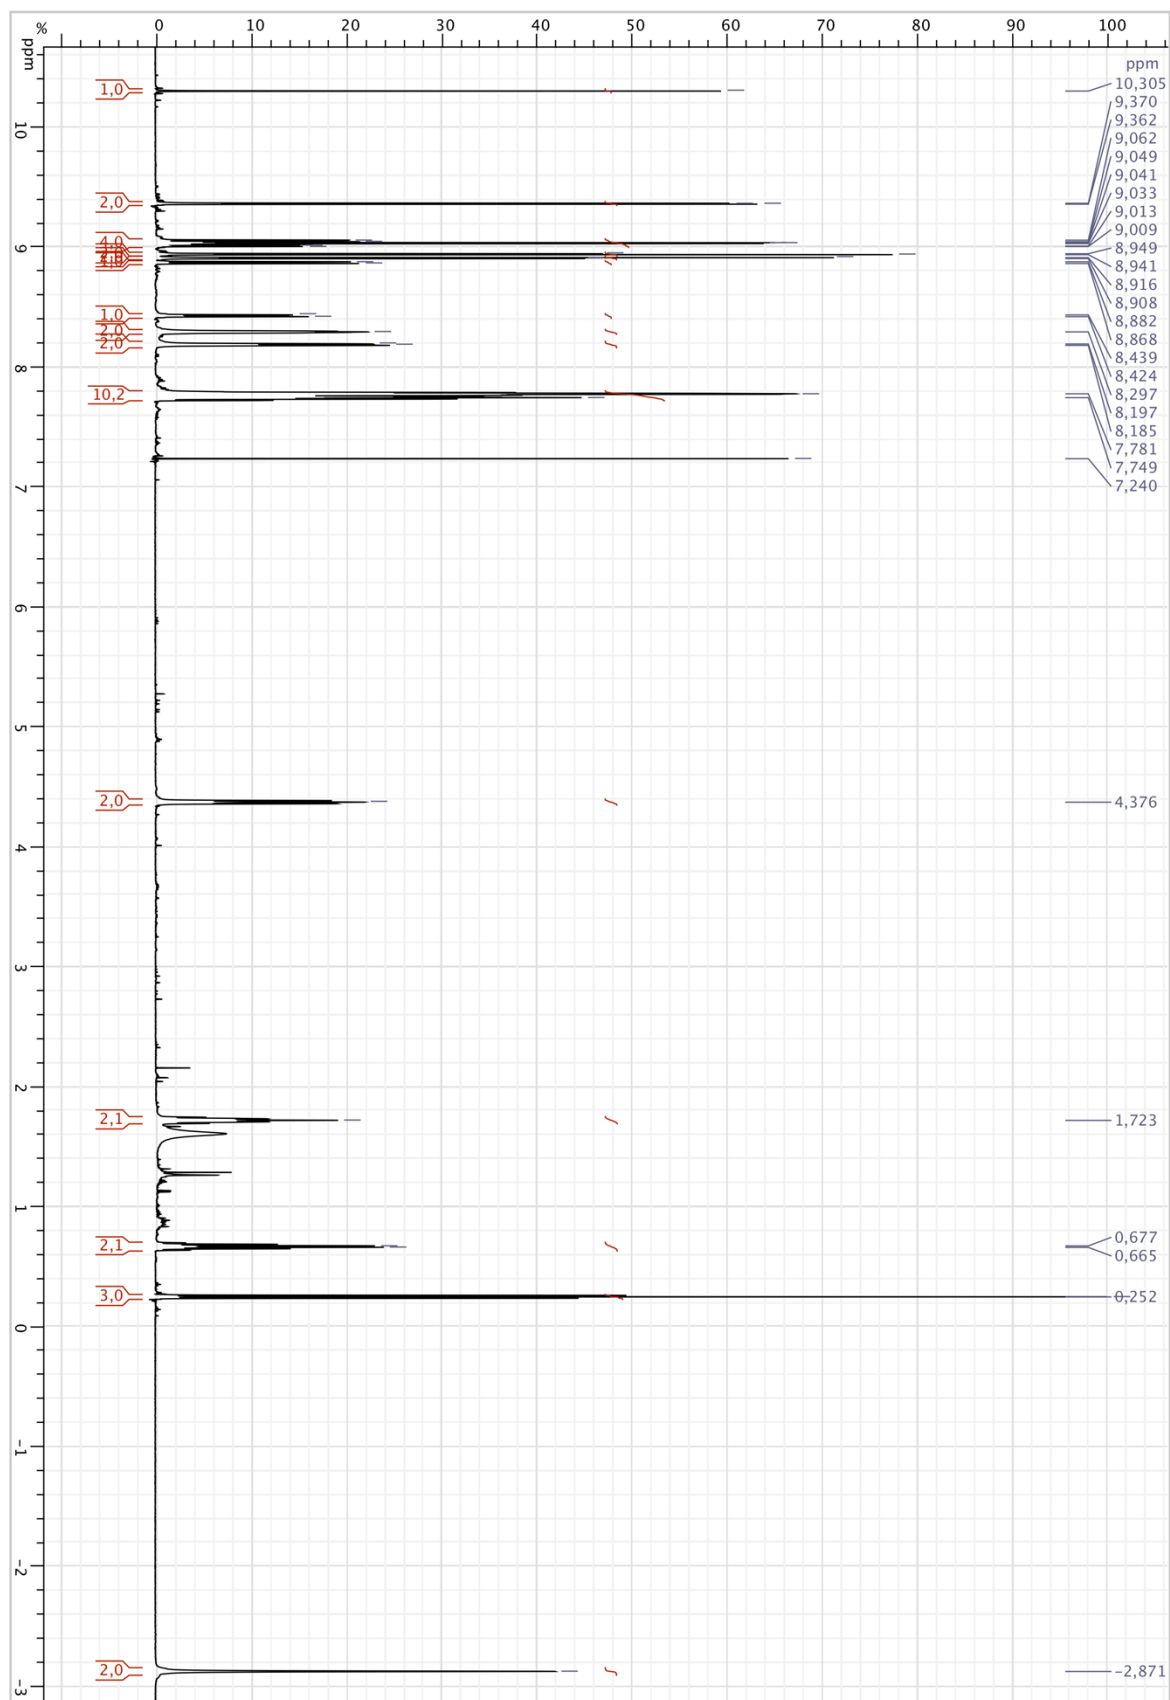

Fig. S9.  $^1\text{H}$ -NMR spectrum of  $9\text{H}_2$  (600 MHz,  $\text{CDCl}_3$ ).

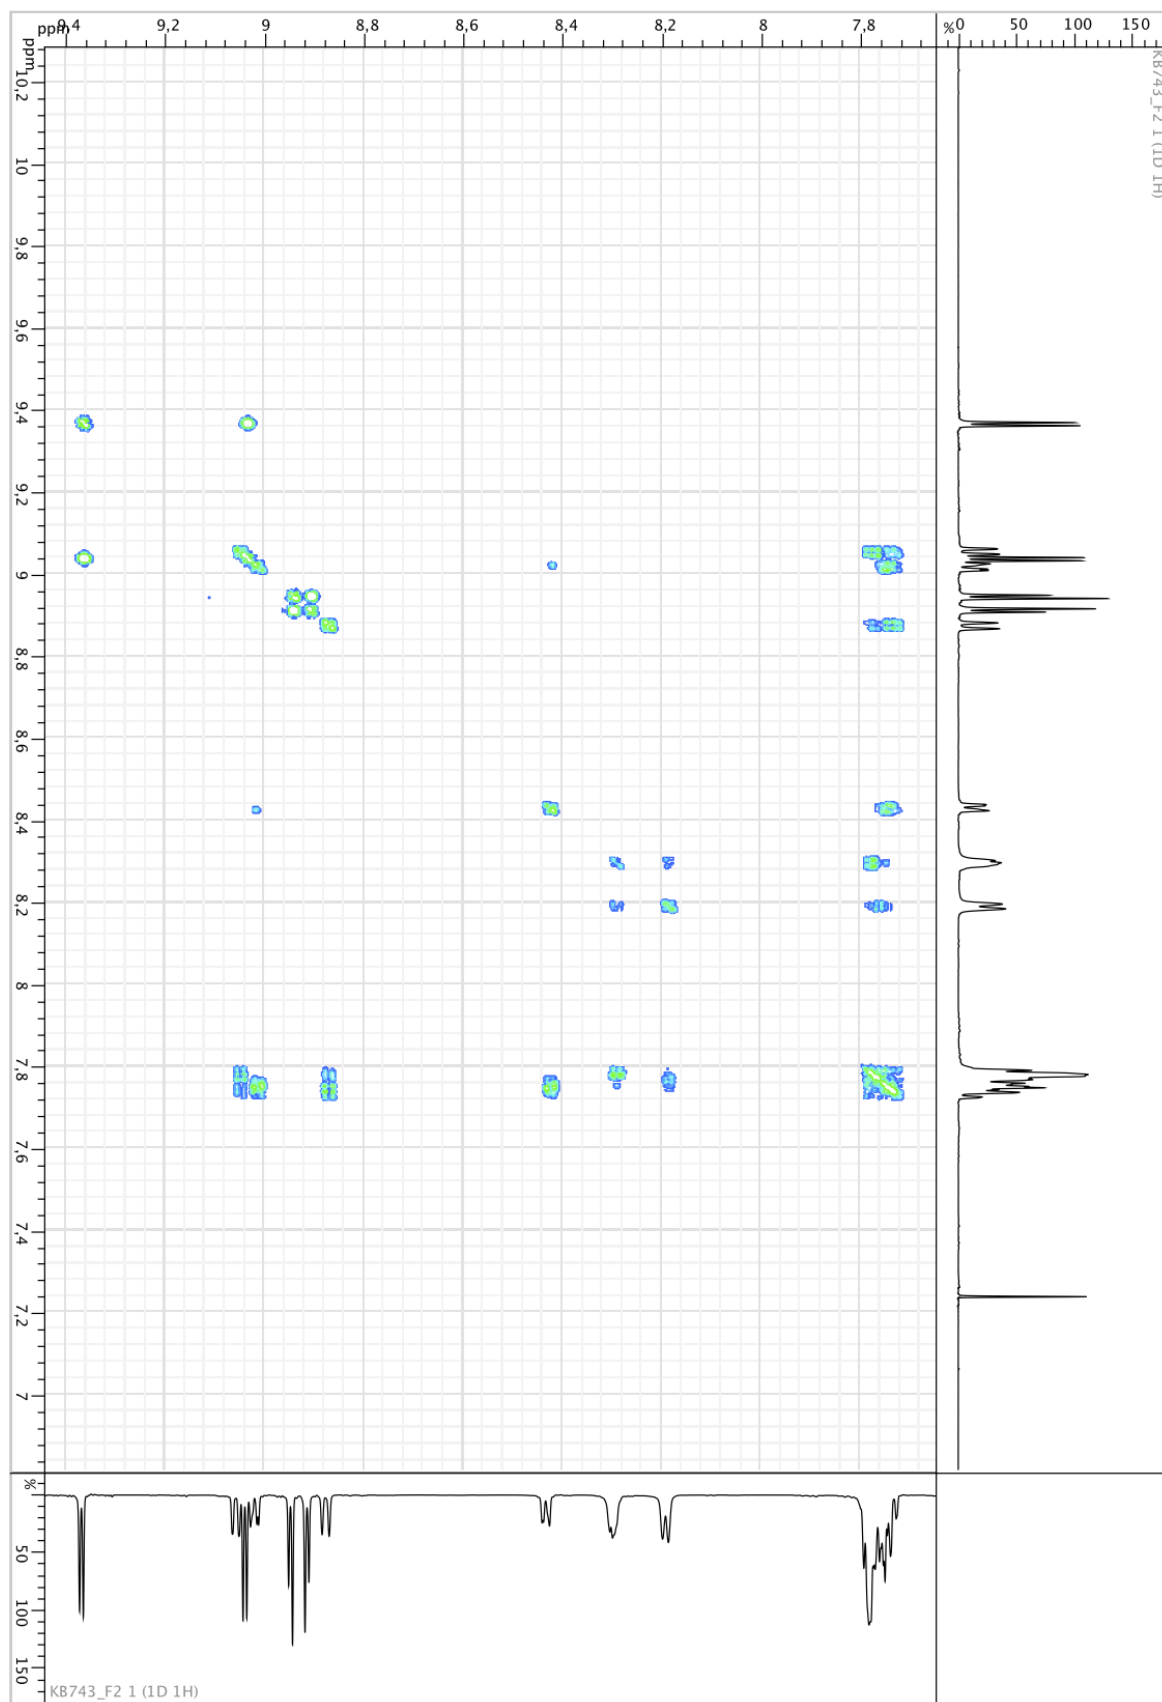

**Fig. S10.** <sup>1</sup>H-<sup>1</sup>H COSY spectrum of **9H<sub>2</sub>** in aromatic region (600 MHz, CDCl<sub>3</sub>).

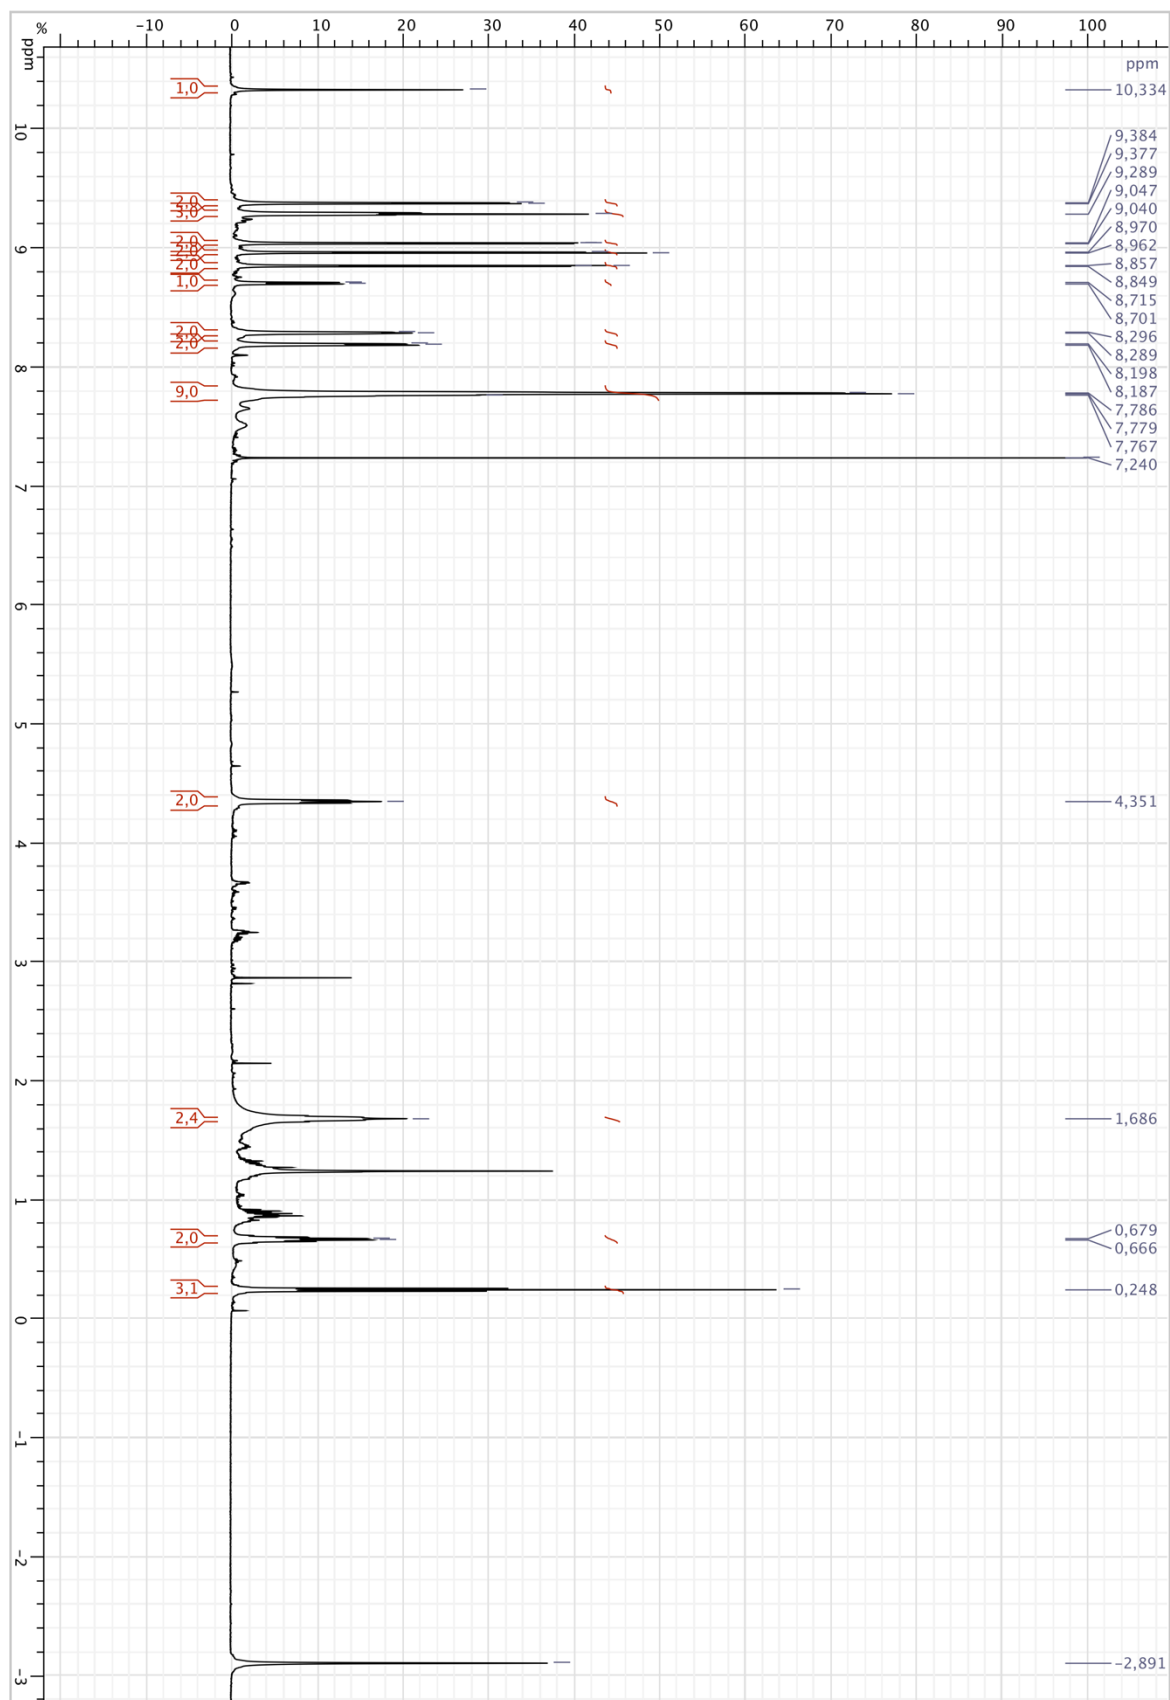

Fig. S11. <sup>1</sup>H-NMR spectrum of 10H<sub>2</sub> (600 MHz, CDCl<sub>3</sub>).

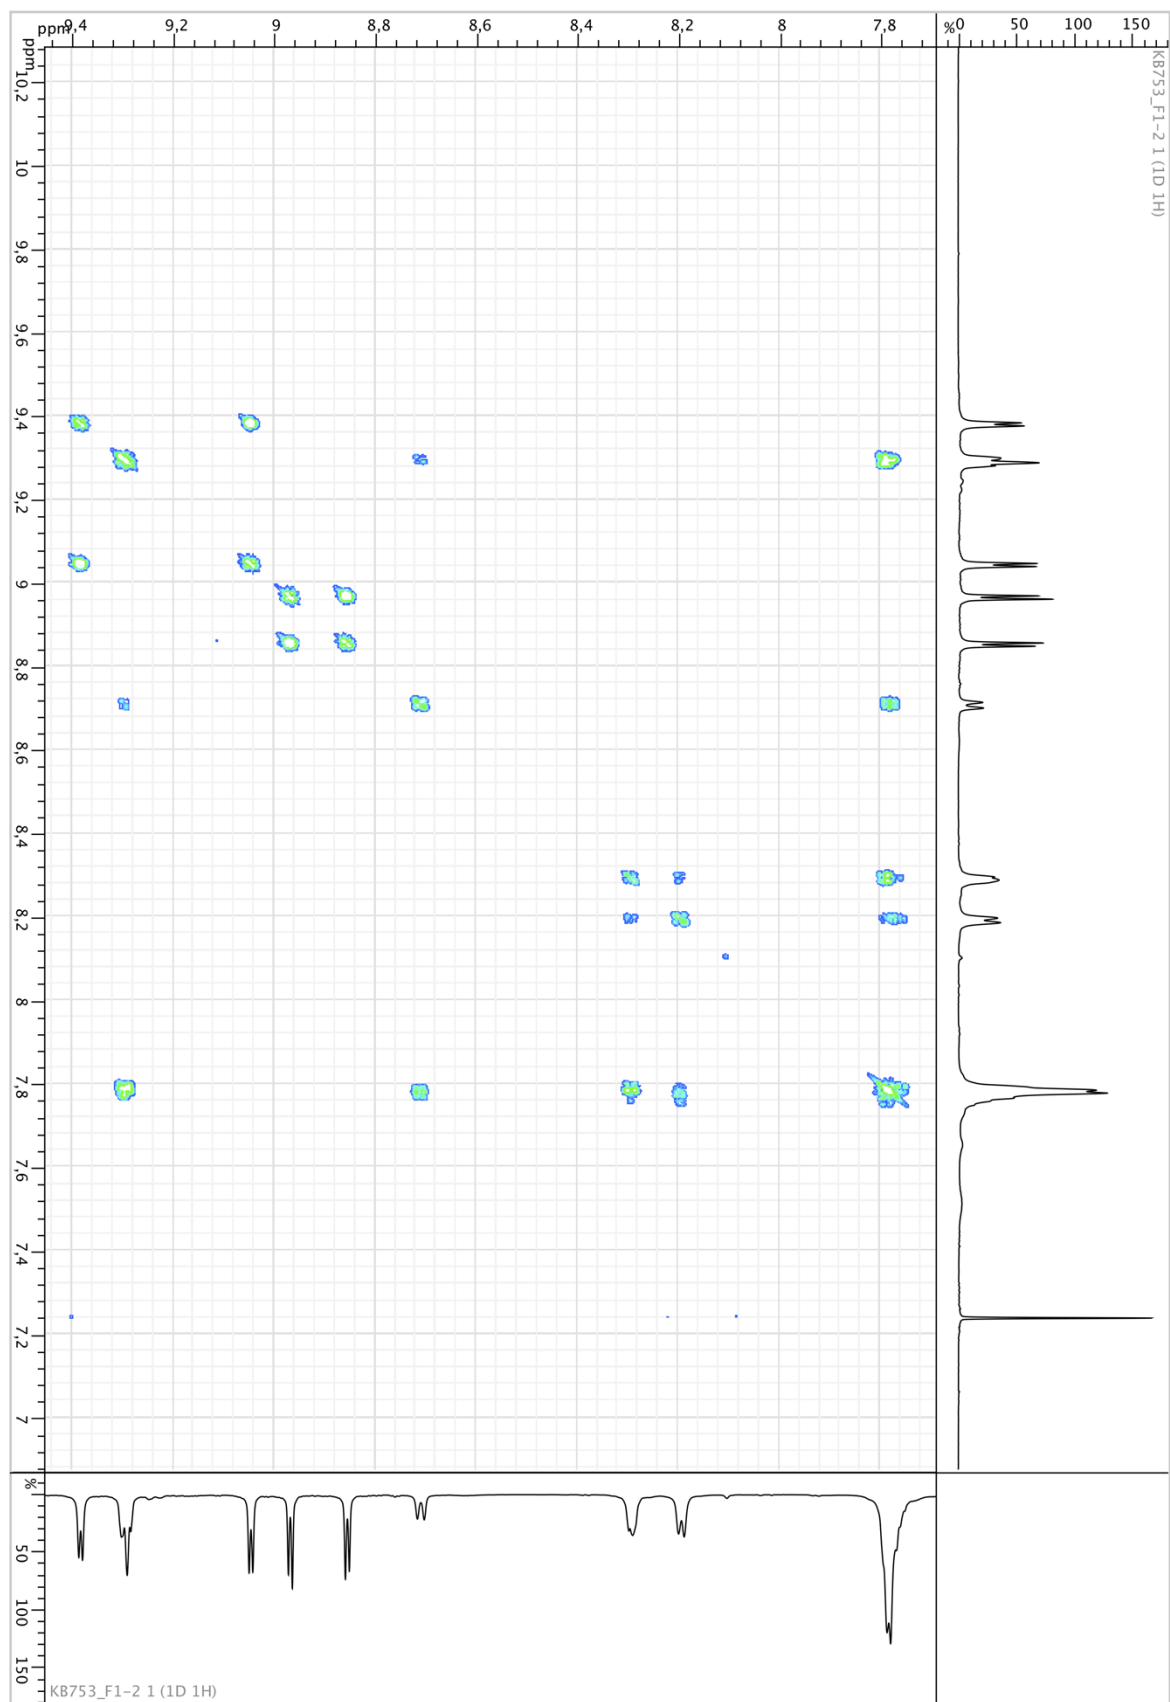

**Fig. S12.**  $^1\text{H}$ - $^1\text{H}$  COSY spectrum of **10H<sub>2</sub>** in aromatic region (600 MHz,  $\text{CDCl}_3$ ).



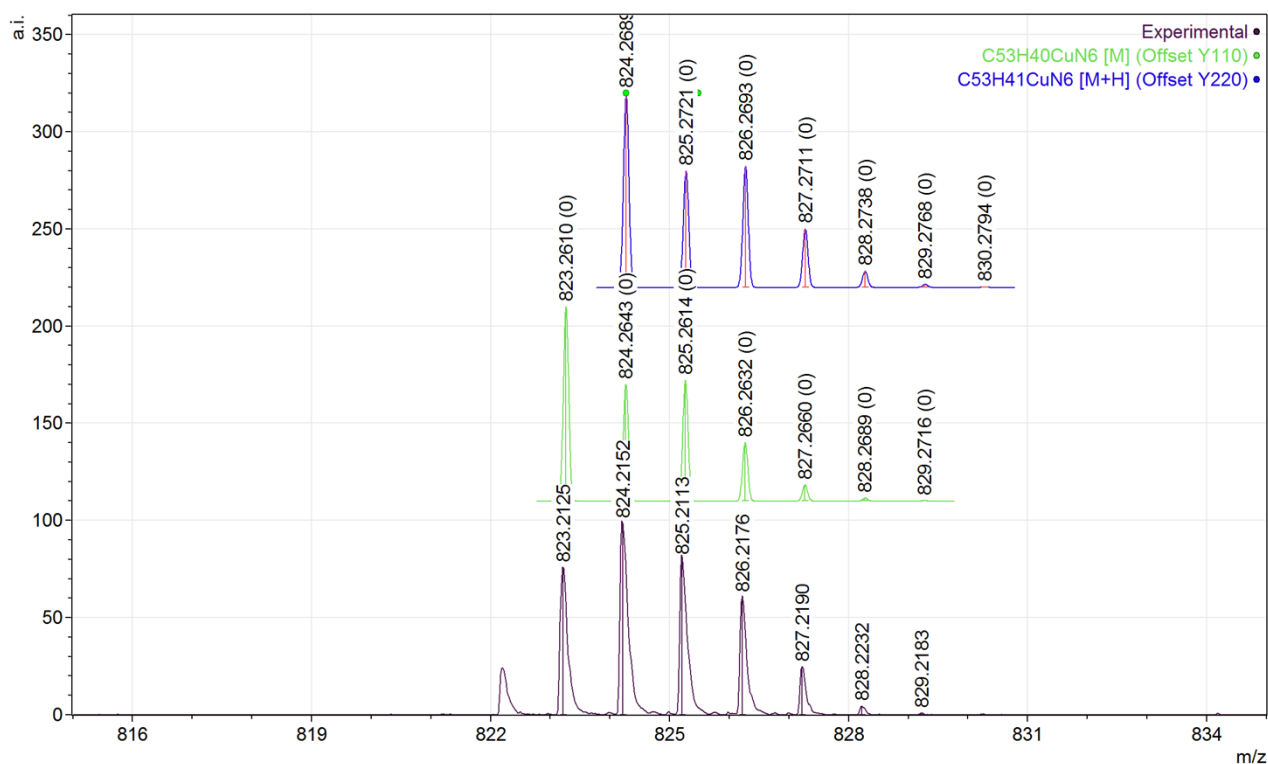

Fig. S13. MALDI-TOF MS spectrum of  ${}^7\text{Cu}$ .

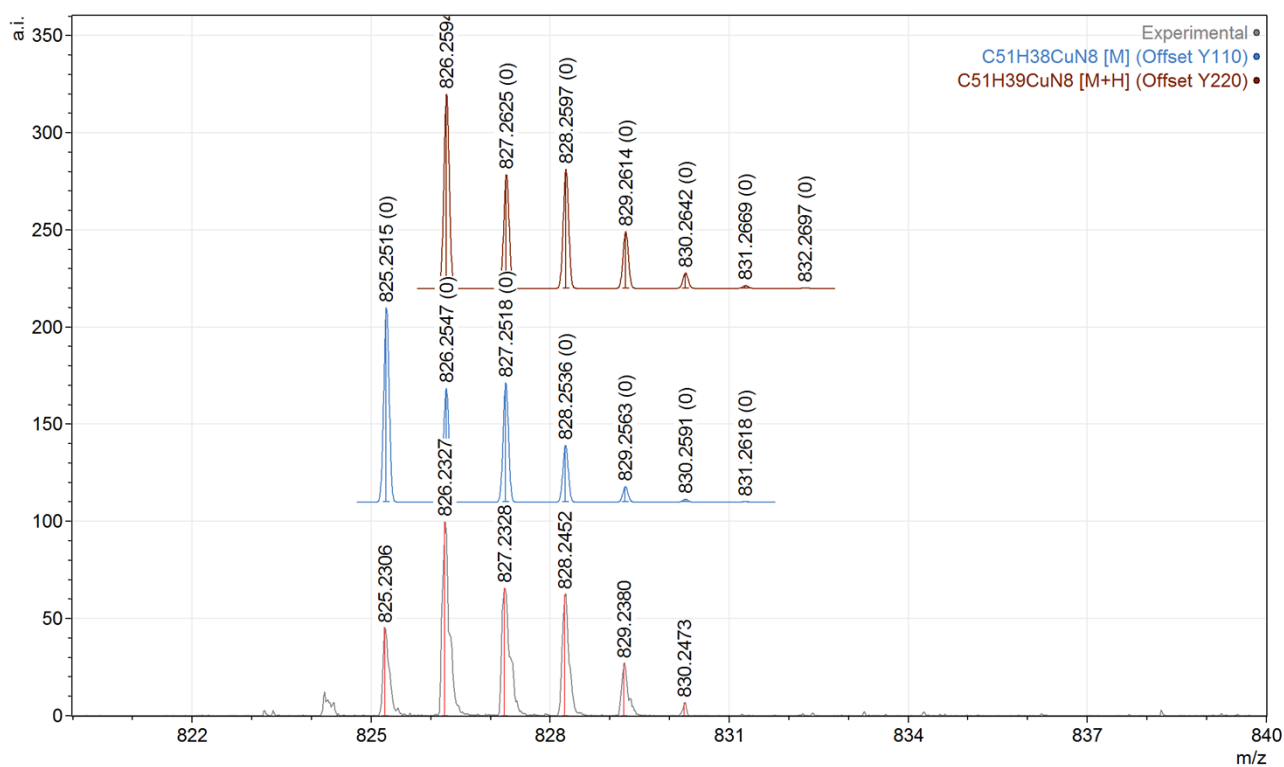

Fig. S14. MALDI-TOF MS spectrum of  ${}^8\text{Cu}$ .

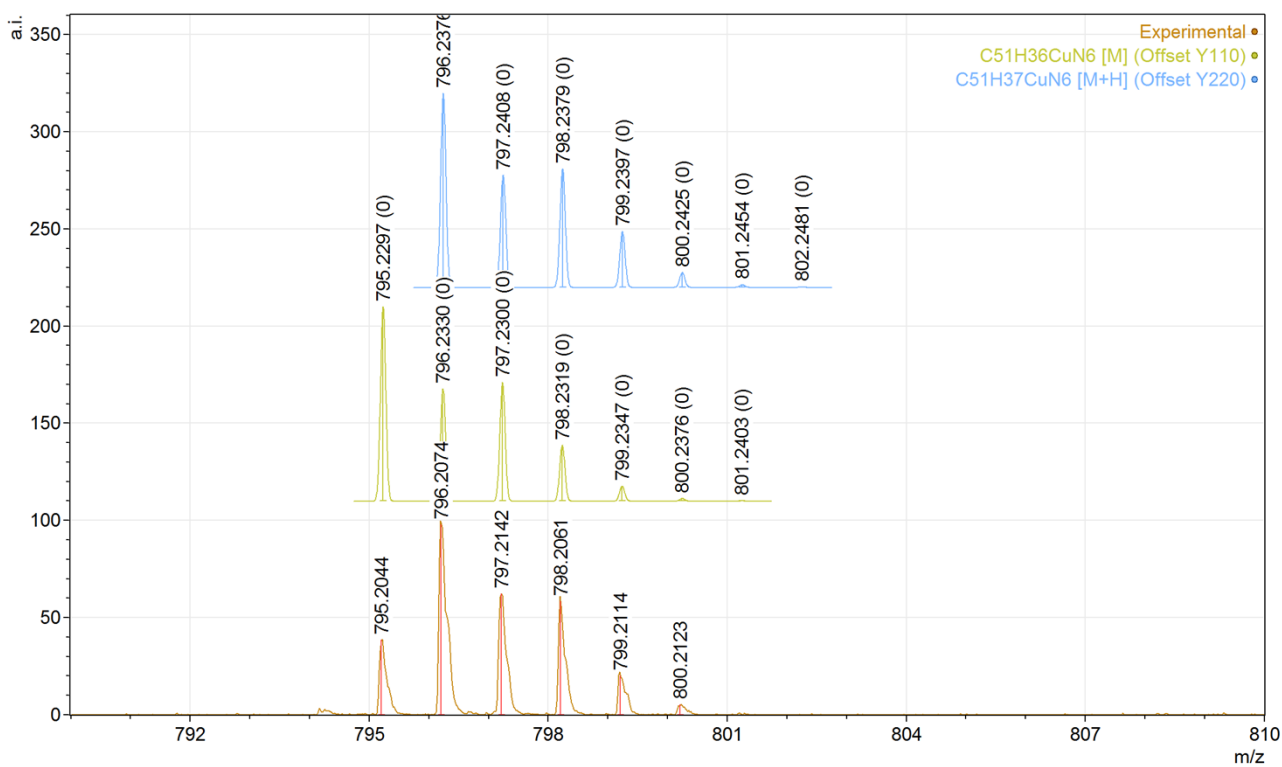

**Fig. S15.** MALDI-TOF MS spectrum of **9Cu**.

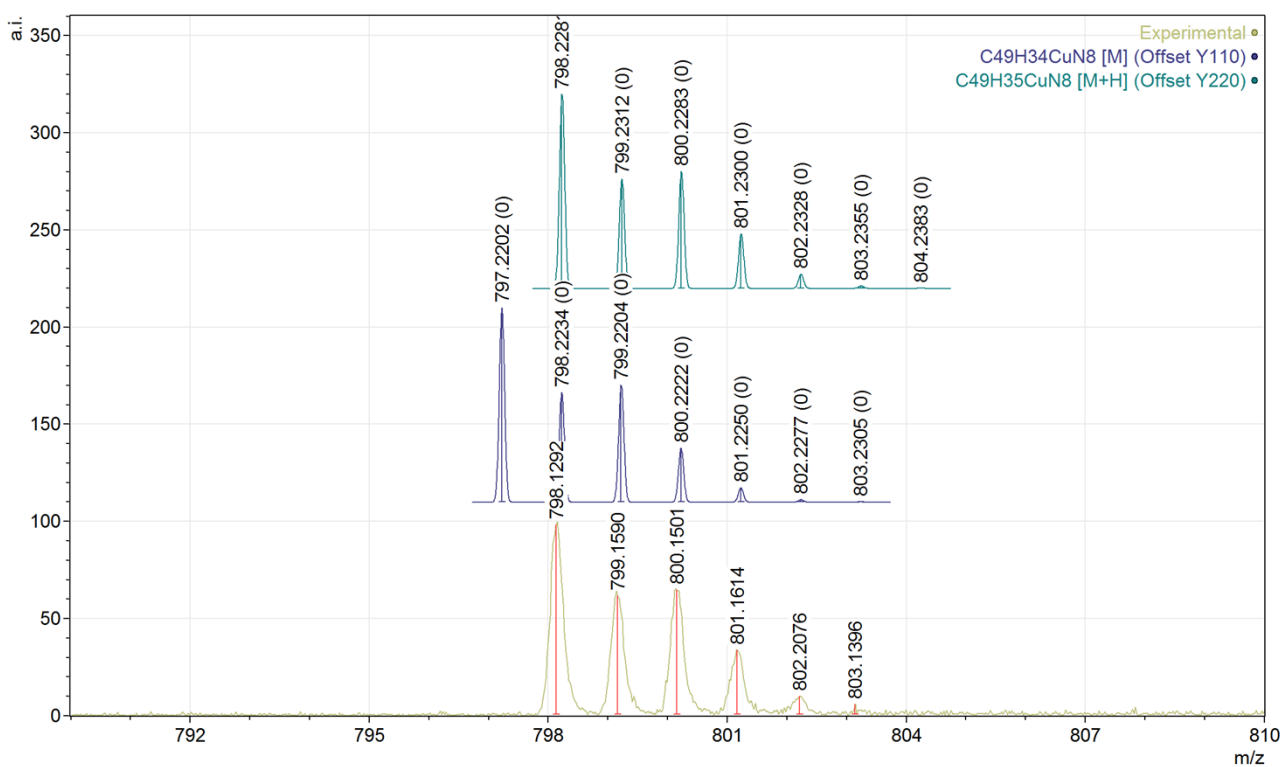

**Fig. S16.** MALDI-TOF MS spectrum of **10Cu**.

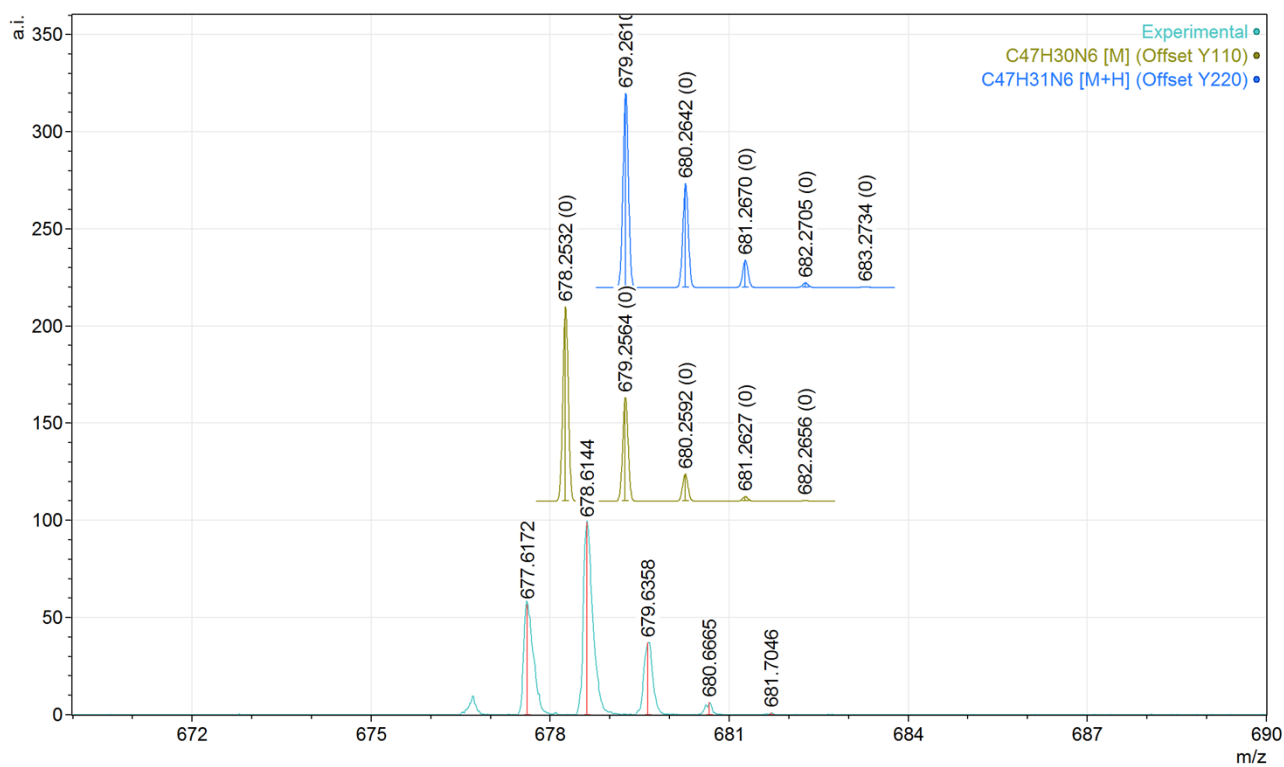

Fig. S 17. MALDI-TOF MS spectrum of 5H<sub>2</sub>.

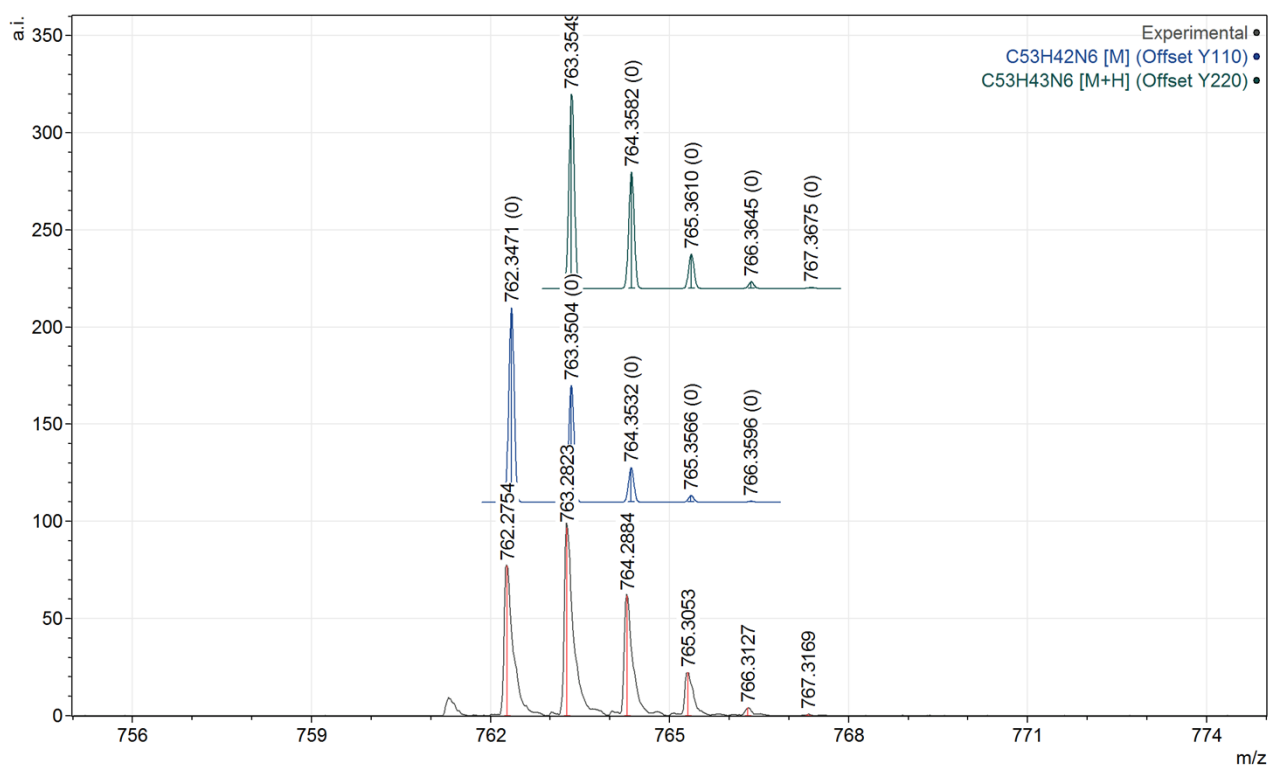

Fig. S 18. MALDI-TOF MS spectrum of 7H<sub>2</sub>.

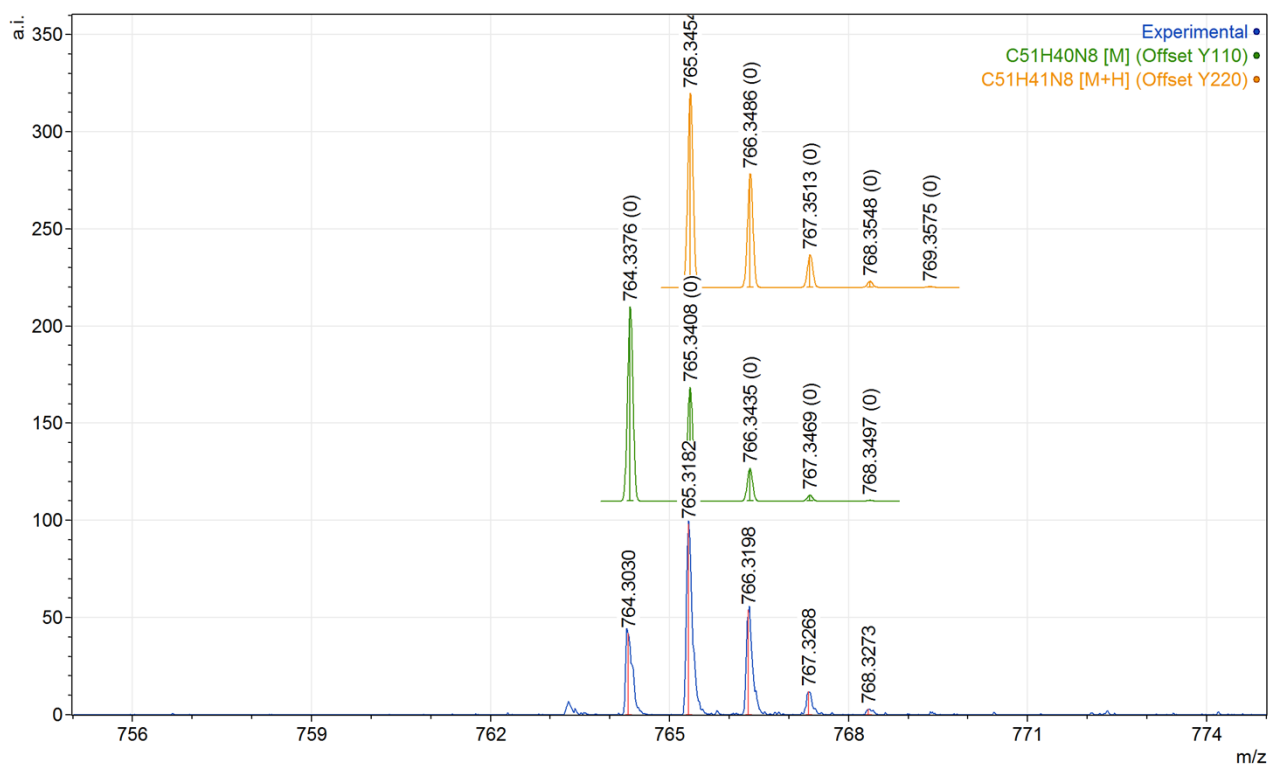

Fig. S19. MALDI-TOF MS spectrum of  $8H_2$ .

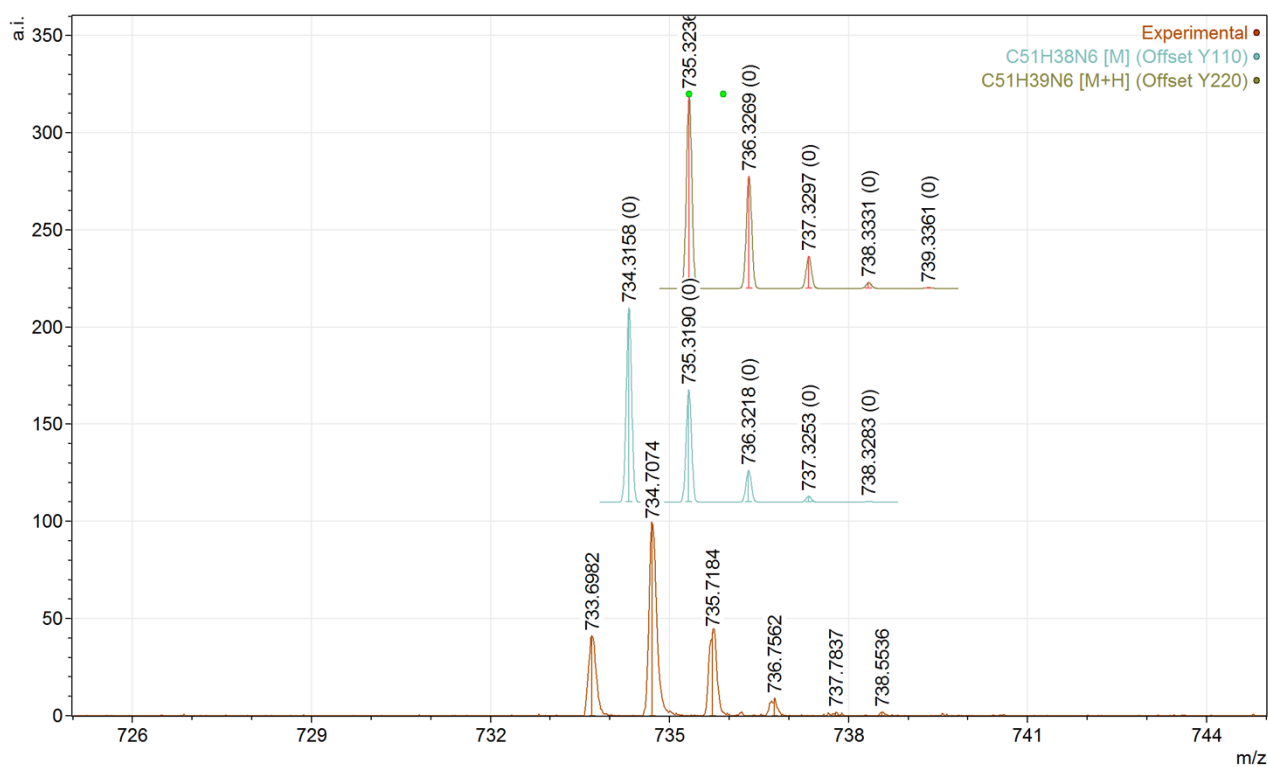

Fig. S 20. MALDI-TOF MS spectrum of  $9H_2$ .

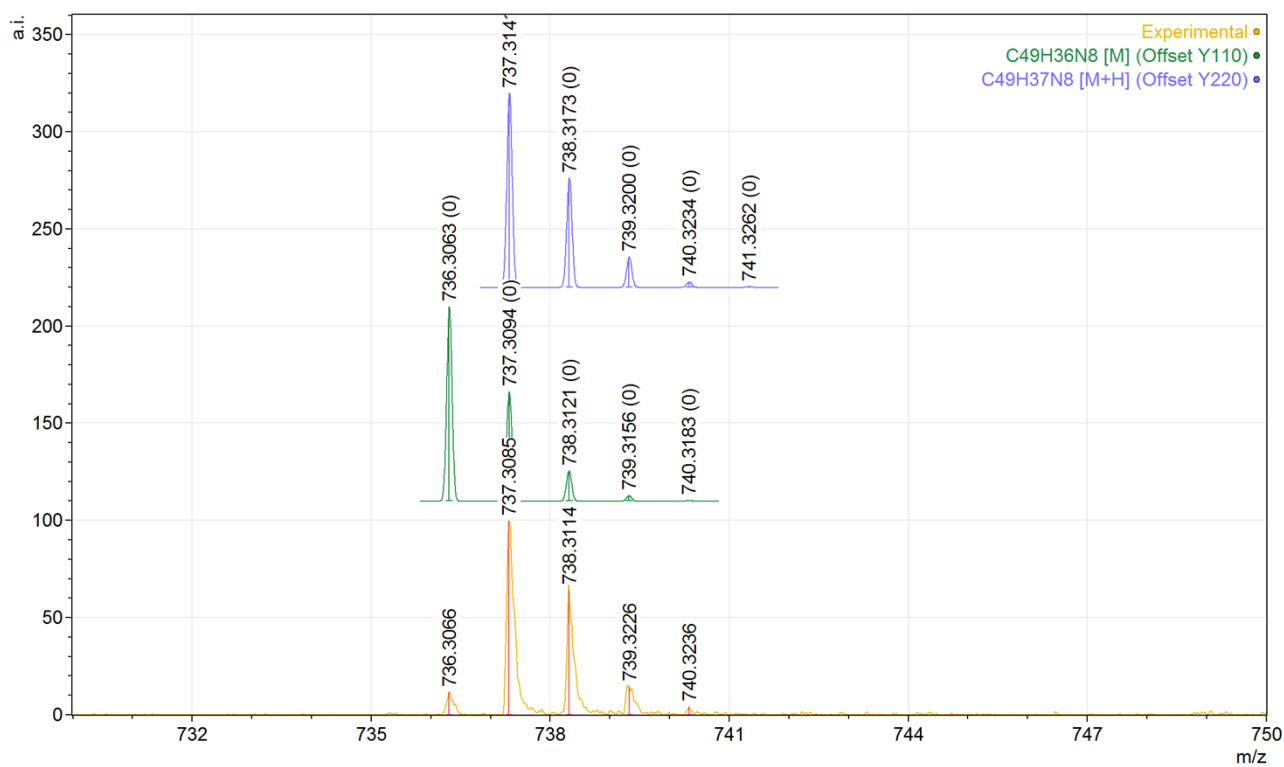

Fig. S21. MALDI-TOF MS spectrum of 10H<sub>2</sub>.

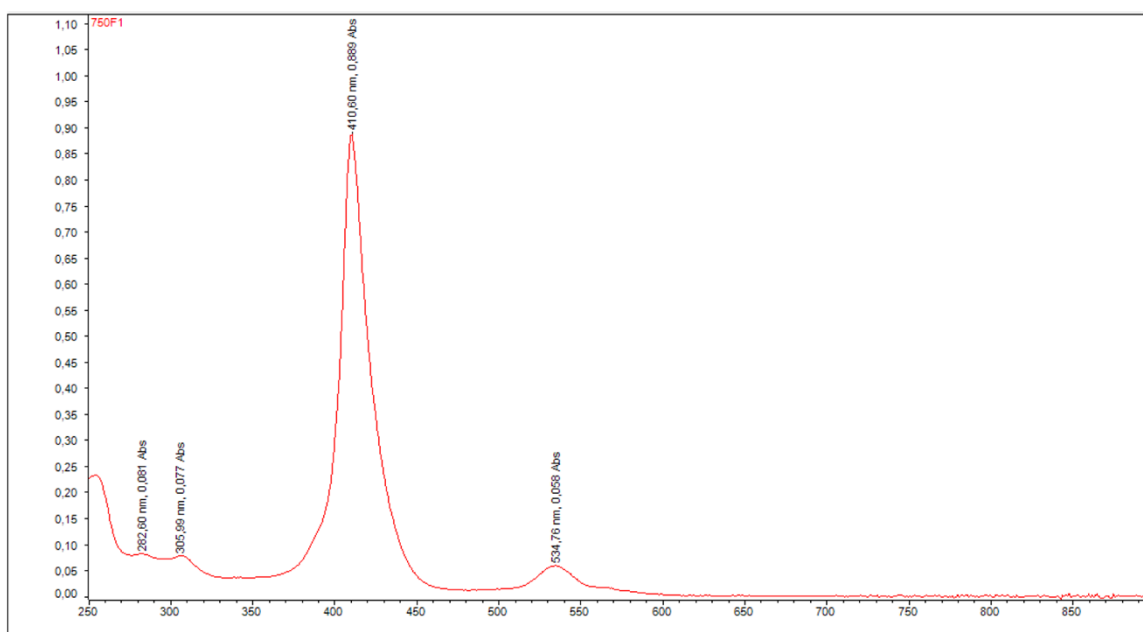

Fig. S22. UV-Vis spectrum of 7Cu (CHCl<sub>3</sub>).

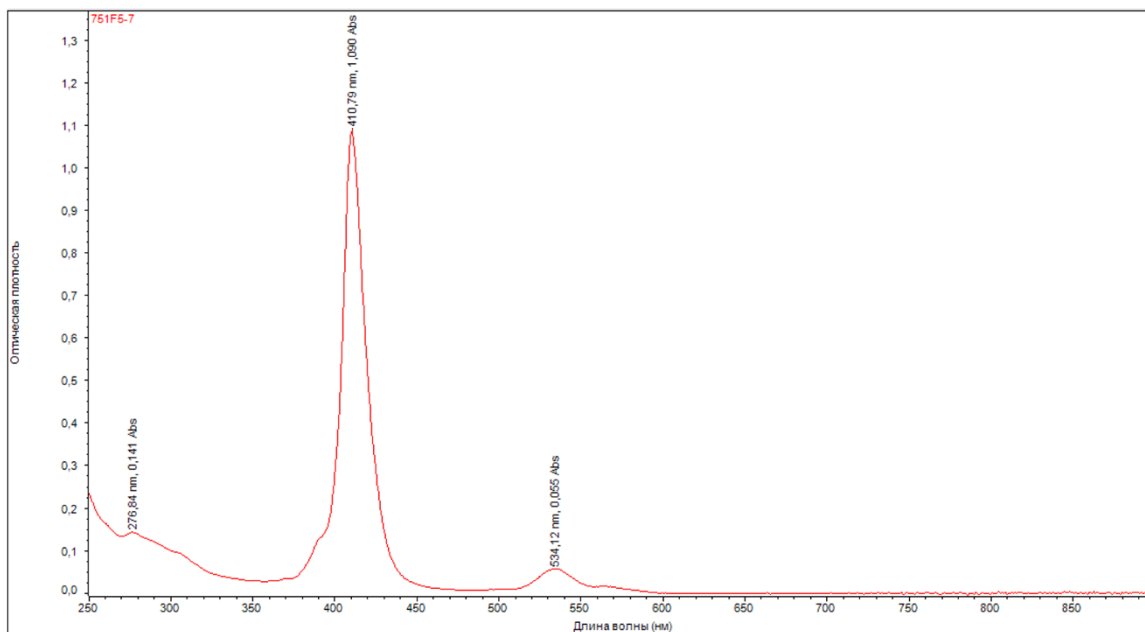

**Fig. S23.** UV-Vis spectrum of **8Cu** ( $\text{CHCl}_3$ ).

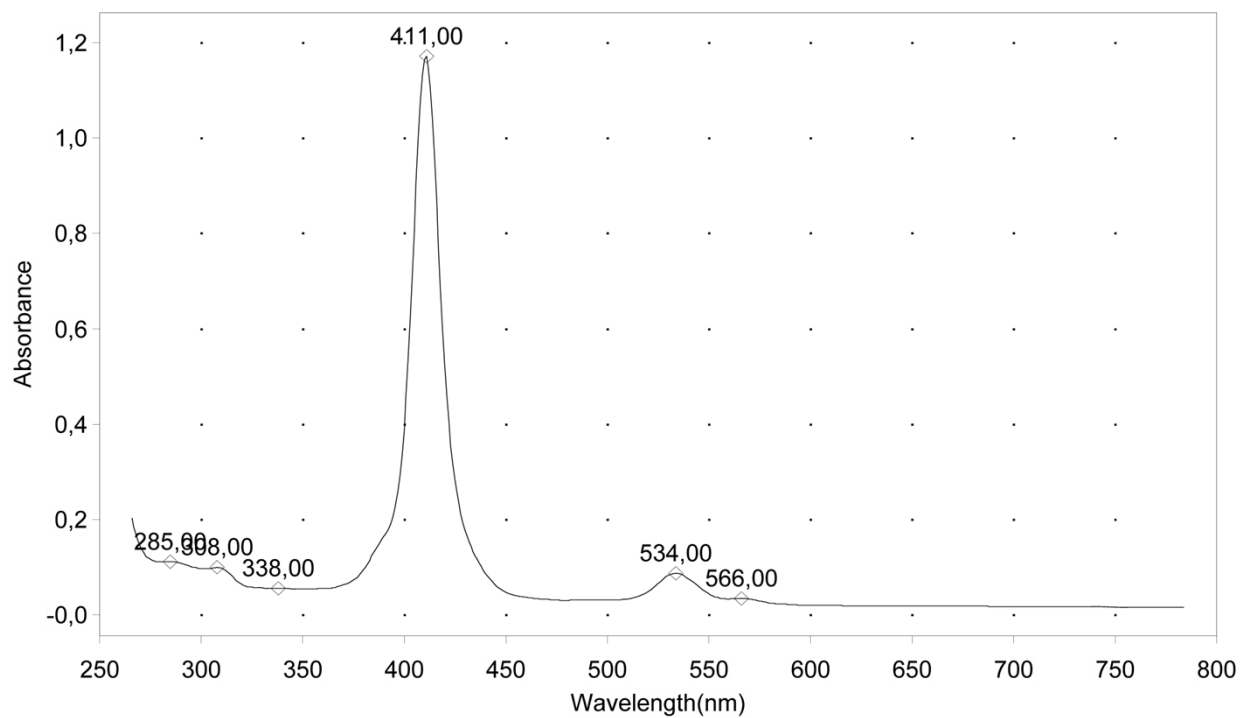

**Fig. S24.** UV-Vis spectrum of **9Cu** ( $\text{CHCl}_3$ ).

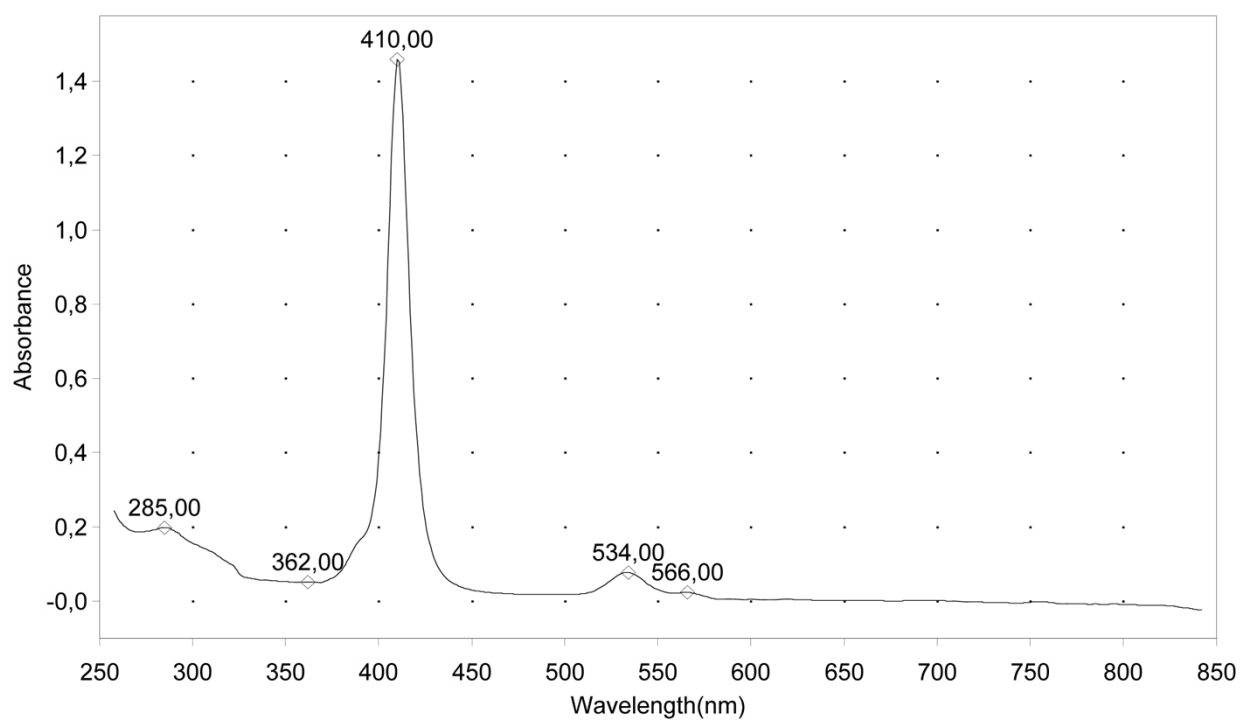

**Fig. S25.** UV-Vis spectrum of **10Cu** (CHCl<sub>3</sub>).

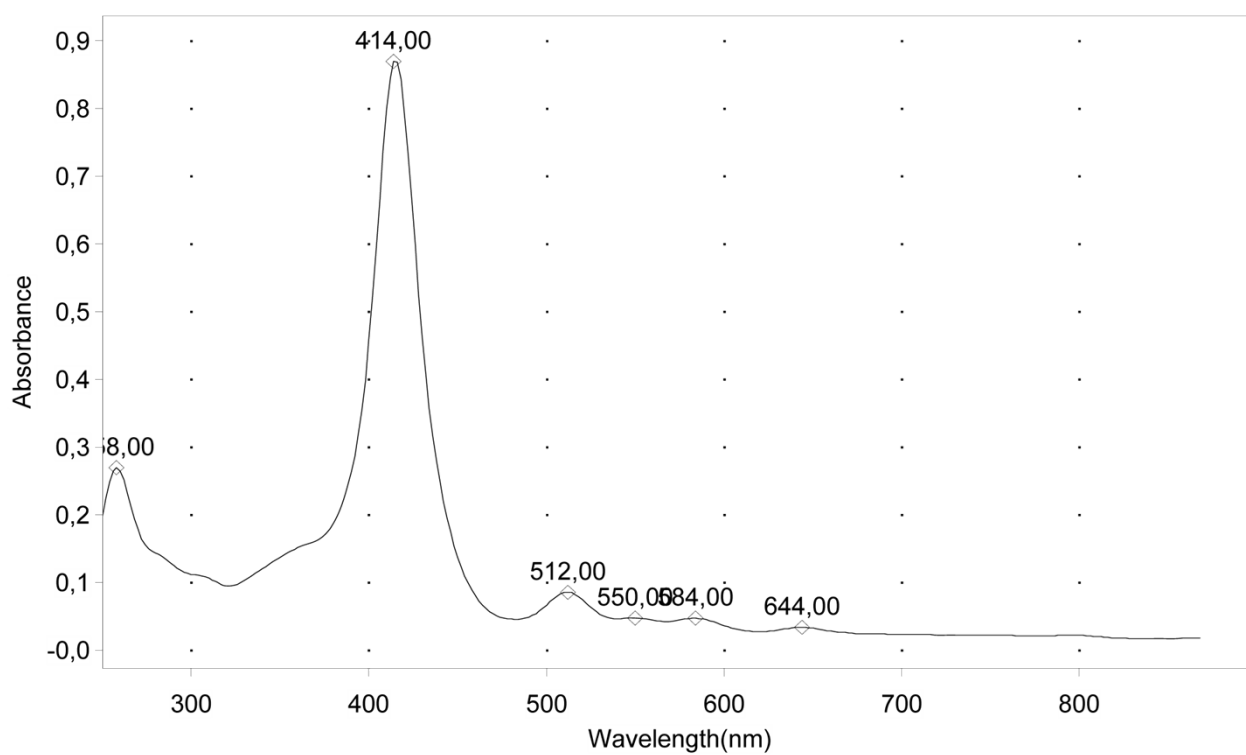

**Fig. S26.** UV-Vis spectrum of **5H<sub>2</sub>** (CHCl<sub>3</sub>).

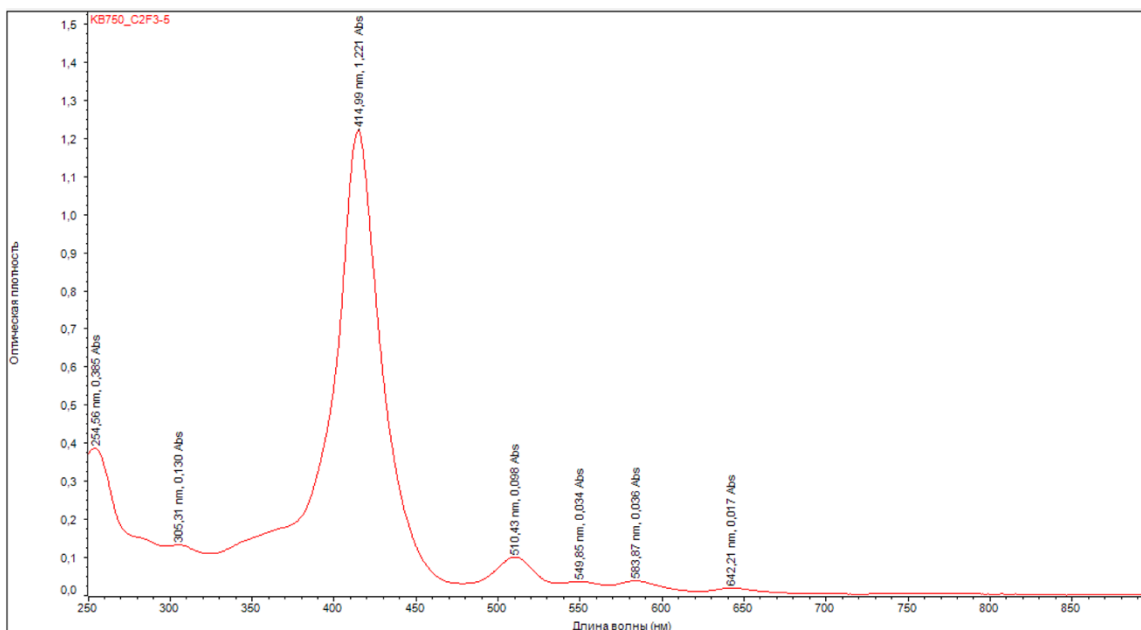

**Fig. S27.** UV-Vis spectrum of **7H<sub>2</sub>** (CHCl<sub>3</sub>).

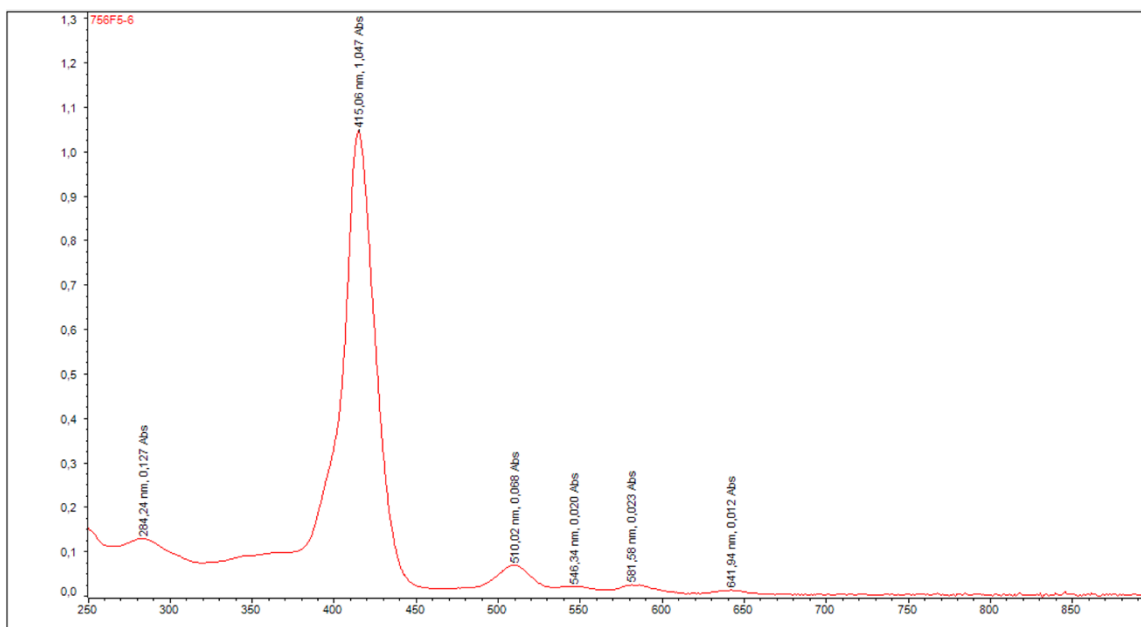

**Fig. S28.** UV-Vis spectrum of **8H<sub>2</sub>** (CHCl<sub>3</sub>).



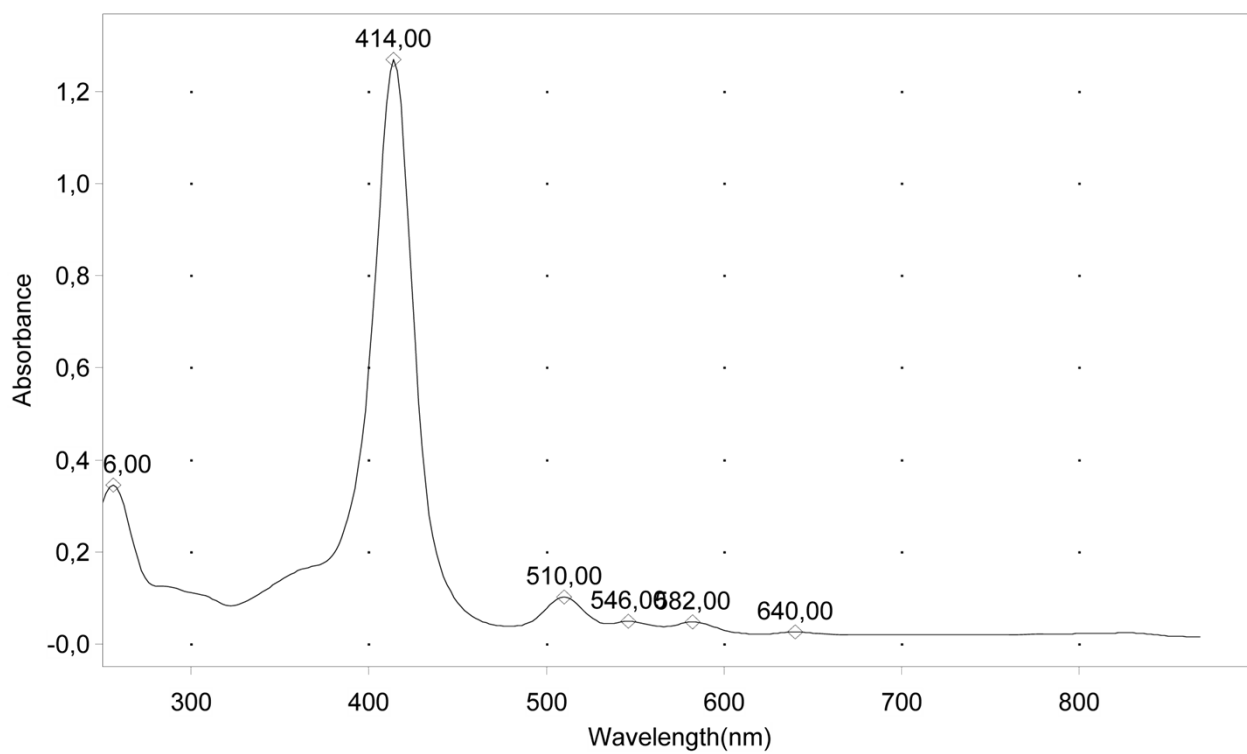

**Fig. S29.** UV-Vis spectrum of **9H<sub>2</sub>** (CHCl<sub>3</sub>).

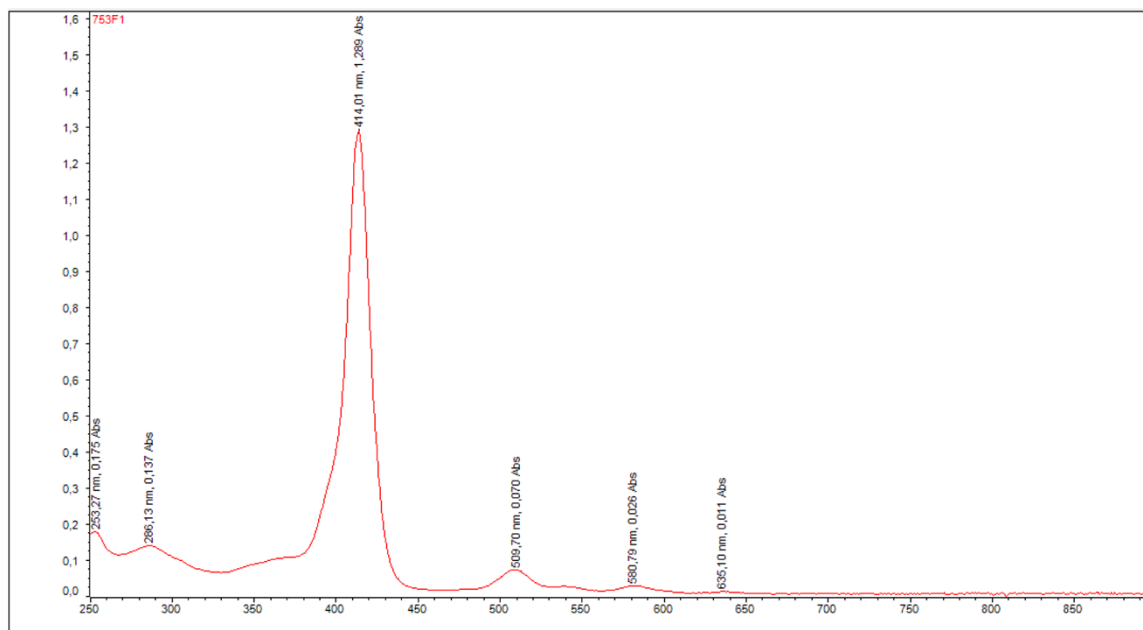

**Fig. S30.** UV-Vis spectrum of **10H<sub>2</sub>** (CHCl<sub>3</sub>).
